# Supplementary material for: ACE2 pathway regulates thermogenesis and energy metabolism
Source: eLife. 2022 Jan 11;11:e72266. doi: 10.7554/eLife.72266 (PMC8776250; doi:10.7554/eLife.72266)
Supplement: Figure 1—source data 1. [file elife-72266-fig1-data1.xlsx]

## Sheet: Sheet1
Figure 1:
A- ACE2 immunoblot				A-Mas immunoblot				B- Ace2 mRNA				B- Mas1 mRNA
BAT	scWAT	Ewat		BAT	scWAT	Ewat		BAT	scWAT	Ewat		BAT	scWAT	Ewat
1.95874	1.02601	0.612141		2.54176	0.195648	0.242591		5.96195	1.33402	0.101235		4.54176	0.384	0.242591
1.78684	0.9774	0.49		3.02536	0.426879	0.518802		5.29924	1.38107	0.099842		4.02536	0.426879	0.518802
1.8784	1.18478	0.3829		2.81398	0.255135	0.132949		5.69	1.39067	0.089361		5.81398	0.255135	0.132949
C- ACE2 immunoblot			C- Mas1 immunoblot				D- Ace2 mRNA													E- Mas1 mRNA
30C	4C		30C	4C		BAT	30C	4C	scWAT	30C	4C	Ewat	30C	4C	Liver	30C	4C		BAT	30C	4C	scWAT	30C	4C	Ewat	30C	4C	Liver	30C	4C
0.590869	1.32115		0.274101	0.523039			0.934963	2.2083		1.03086	7.69463		1.03848	15.079		0.536563	1.39651			0.8098	2.42106		0.834969	2.02763		0.923258	0.501668		1.5141	0.124005
0.406532	1.36946		0.640371	0.439698			0.922091	2.97467		1.06722	9.02453		0.923044	16.1613		0.454335	1.34894			1.12166	2.54143		0.999858	1.33774		0.891809	0.58431		1.3181	0.038432
0.691028	1.29658		0.330318	0.321818			0.825294	2.96125		1.07464	8.65691		1.03848	16.7312		1.57115	1.07313			1.06854	2.25893		1.14854	3.18169		1.18493	0.410316		0.73635	2.49544
							1.16714	2.2083		0.831537	7.48422			6.60918		1.43577	1.1422			1.16714	2.16691		0.795423				1.44875		0.938523	0.237906
							1.02312	2.2083		0.995747	4.90364			7.13281			1.1033			1.02312	2.87914		0.920057				1.53135		0.492591	0.05785
							1.12739	2.1196		0.878949	13.0308			12.3332			1.08811			1.12739	2.1196		1.30116				1.49984
F- Sureum ACE2				G-Surum Ang(1-7)
0d	2d	4d		0d	2d	4d
19.6413	33.7612	30.8059		344.095	396.588	467.989
25.9898	5.77155	31.7753		361.857	463.891	561.601
4.69263	36.7009	38.4678		365.539	478.414	520.461
13.9026	33.4641	38.0769		153.39	451.835	474.213
9.05526	32.307	36.6071
6.11556	34.4179	35.0278
