# Supplementary material for: ACE2 pathway regulates thermogenesis and energy metabolism
Source: eLife. 2022 Jan 11;11:e72266. doi: 10.7554/eLife.72266 (PMC8776250; doi:10.7554/eLife.72266)
Supplement: Figure 2—figure supplement 1—source data 1. [file elife-72266-fig2-figsupp1-data1.xlsx]

## Sheet: Sheet1
Figure 2-figure supplement 1
A- IPGTT													A- AUC
	ACE2-/y						WT						WT	ACE2-/y
0	7.1	6.8	6.7	6.2	7.9	9.2	9.8	10.9	10.2	6	9.1		1930	2177
15	19.8	35	16.9	26.3	21.9	23.7	24.1	19.1	23.2	14.6	24.3		1939	2437
30	22.4	27.7	22.7	32.4	22.3	27.6	19.3	19.6	23	14.2	22.7		1887	2006
60	21.8	21.1	19.2	30.2	17.7	21.1	15.3	16.3	15.4	10.1	18.2		1302	3255
120	11.4	9.6	10.9	24.2	7.5	10.2	12.4	13.2	8.4	8.8	6.5		1958	1911
														2301
B- TG			C- TC			D- food intake			E- Drink intake			F- Activity
WT	ACE2-/y		WT	ACE2-/y		WT	ACE2-/y		WT	ACE2-/y		WT	ACE2-/y
1.105	1.227		4.142	3.608		5.04	4.18		3.56	4.52		324.434	387.316
1.033	1.294		2.612	4.512		4.12	6.46		2.9	3.86		372.724	322.776
0.92	2.025		4.408	3.97		4.78	4.96		3.66	2.62		224.921	408.474
1.216	1.805		3.924	3.776		6.06	4.14		4.1	4.16		433.447	347.092
1.35			4.328	3.46		5.28	3.78		3.02	3.62		381.5	291.184
				3.71
G- Core body temperature
	ACE2-/y					WT
0	36.9	36.7	36.7	37.1		37	36.8	37.2	37.3
1	32.6	32.9	32.8	31		33.3	33.8	33.2	34.9
2	32.6	32.4	33.7	32		33.9	34.6	34	35.2
3	31.1	32	31.4	31.3		32.9	33	33.9	32.3
H- mRNA								I- mRNA
	WT			ACE2-/y					WT			ACE2KO
UCP1	1	1.0934	1.1203	0.366487	0.36487	0.3487			Mean	SD	N	Mean	SD	N
PRDM16	1	1.0934	1.1203	0.310053	0.30053	0.3053		UCP1	1	0.041868	3	0.173576	0.039115	3
AP2	1	1.0934	1.1203	0.97157	0.9157	0.957		PRDM16	1	0.098276	3	1.39856	0.064492	3
PGC-1α	1	1.0934	1.5203	2.49807	1.4807	0.707		AP2	1	0.129251	3	1.2564	0.312512	3
PGC-1β	1	1.0934	1.1203	1.05114	1.15114	0.905114		PGC-1α	1	0.137338	3	0.373113	0.048213	3
CPT-1α	1	1.0934	1.5203	1.45329	1.5329	1.429		PGC-1β	1	0.166502	3	0.211402	0.034833	3
PPARγ	1	1.0934	1.1203	0.544112	0.54112	0.5112		CPT-1α	1	0.115969	3	0.756784	0.105769	3
								PPARγ	1	0.093172	3	0.620316	0.064631	3
