# Supplementary material for: ACE2 pathway regulates thermogenesis and energy metabolism
Source: eLife. 2022 Jan 11;11:e72266. doi: 10.7554/eLife.72266 (PMC8776250; doi:10.7554/eLife.72266)
Supplement: Figure 2—source data 1. [file elife-72266-fig2-data1.xlsx]

## Sheet: Sheet1
Figure 2:
A- Body weight			B- Ang-(1-7)			C- VO2												C- VCO2
WT	ACE2-/y		WT	ACE2-/y		Time	WT					ACE2-/y							WT						ACE2-/y
39.1	26.8		174.233	135.67		1	87.8407	87.8407	73.9116	99.9024	72.4183	61.6915	55.3504	60.7767	55.2391	70.2515		Full day	56.9882	51.6657	48.7597	60.5215	44.7985		44.7761	36.7006	48.6808	35.6743	58.9986
33.3	25.6		191.636	170.41		2	81.5008	81.5008	69.4008	108.915	88.4052	51.6384	51.8076	60.2667	49.4374	69.1564		Light	51.6657	61.4236	44.5259	52.1984	41.735		41.8593	38.9178	44.9978	39.2472	56.3655
37.5	28.7		282.108	111.249		3	83.6946	83.6946	85.7262	83.538	90.845	60.0442	57.5593	59.7006	49.0946	70.9862		Dark	61.4236	56.9882	52.2879	56.7383	47.3515		47.2067	40.7655	47.0067	37.6232	61.193
27.8	26.5		272.181	117.433		4	88.3951	88.3951	72.9078	92.3676	82.836	60.7992	57.6155	62.8473	50.2207	68.679
33.6			244.003			5	90.1692	90.1692	69.7578	85.9365	77.8159	56.7917	55.5797	57.7575	50.7797	71.9784
			255.756			6	88.4308	88.4308	79.5942	96.33	73.4791	56.8339	53.7077	58.4868	53.4643	68.7071
						7	85.7855	85.7855	82.6476	94.9026	70.0471	52.6363	54.1476	55.8144	52.7626	69.147
						8	82.4551	82.4551	80.9928	92.4651	90.5237	54.648	47.6892	53.3103	46.9567	67.9208
						9	80.0712	80.0712	77.784	82.3914	73.1671	57.552	47.4833	53.3154	43.3296	63.2268
						10	78.6773	78.6773	70.8708	80.6208	76.6678	44.7744	45.6815	51.8007	49.5475	57.6014
						11	68.8525	68.8525	62.1432	80.067	70.9987	46.9234	45.1901	50.1279	41.2733	0.283454
						12	64.8212	64.8212	63.357	88.3623	70.2218	47.6678	47.385	55.7175	46.153	0.479267
						13	68.3417	68.3417	57.2922	86.1276	77.1514	49.3997	53.2958	51.6375	46.6548	0.675079
						14	79.5841	79.5841	67.2294	93.1437	65.5949	50.556	52.0276	52.8054	46.0754	0.870892
						15	71.9611	71.9611	57.5652	78.312	74.0688	53.8877	43.5755	55.3248	48.0624	1.0667
						16	75.6241	75.6241	63.8274	82.9218	71.9878	49.8274	50.8154	58.9866	46.3978	1.26252
						17	82.5145	82.5145	62.2944	86.5761	82.836	51.4483	52.7389	54.4425	51.4529	1.45833
						18	73.7867	73.7867	60.9042	88.2765	78.2777	51.1051	54.405	55.1055	50.6083	1.65414
						19	77.4022	77.4022	64.7808	87.0831	90.0619	53.1326	45.8827	54.8811	53.7336	1.8499
						20	77.4655	77.4655	65.2722	98.6037	78.883	54.2678	67.6166	59.7669	45.4838	2.04571
						21	88.2446	88.2446	69.7284	100.608	79.2511	54.3101	54.508	61.4091	46.867	2.24153
						22	96.2082	96.2082	68.0652	85.02	80.9328	60.0758	46.4116	62.6076	53.2685	2.43734
						23	91.6027	91.6027	80.1108	87.9177	86.1494	63.6134	60.6247	56.6355	51.9343	2.63315
						24	92.569	92.569	73.3908	101.299	82.5178	61.4064	58.4485	62.7861	50.9918	2.82896
E- EE														F- Core body temperature									H- SUV			I- UCP1 level
	WT						ACE2-/y						30C	WT	ACE2-/y	22C	WT	ACE2-/y	4C	WT	ACE2-/y		WT	ACE2-/y		WT	ACE2-/y
Full day	7.9847	4.17094	6.78185	3.89719	7.43921		5.52015	2.83355	2.59394	2.67706	6.46889			36.9	36.6		36.6	35.6		33.1	30.5		0.8344	0.033107		0.9644	0.4332
Light	4.17094	3.66686	3.60314	4.64835	4.00918		2.92224	5.28977	3.13398	2.18201	3.37573			36.8	36.5		37	35.5		32.5	31.6		1.4	0.052946		1.276	0.5673
Dark	3.66686	7.9847	3.07663	8.65762	3.33935		2.51086	2.38528	5.79431	4.90657	2.97287			37	36.8		36.8	34.1		34.1	31.3		0.31437	0.14696		0.975	0.9396
														36.6	36.3		36.9	35.2		33.2	29.8		0.69306	0.034113		0.874	0.6323
														36.7	36.9		37.1	36.7		32.7	31.2					0.9487	0.8811
J- immunoblot								K- immunoblot
	WT			ACE2-/y					WT			ACE2-/y
UCP1	0.796426	0.785513	1.05695	0.587528	0.548158	0.206942		UCP1	0.923208	1.0328	0.938214	0.375977	0.378448	0.418589
PGC-1α	0.574512	0.554057	0.640249	0.193728	0.221864	0.294881		PGC-1α	0.876077	1.09835	1.01638	0.693766	0.741533	0.763994
ATP5A	0.753212	0.688881	1.0057	0.369273	0.436988	0.215411		ATP5A	0.843099	1.15565	1.14611	0.616747	0.750342	0.532774
UQCRC2	2.03442	2.85366	2.02568	2.83139	2.26835	2.74741		UQCRC2	2.17284	2.31776	2.19436	1.95165	2.00367	2.00781
SDHB	2.94193	2.91698	2.16619	2.03799	2.37845	2.68992		SDHB	1.85882	2.20616	1.98402	1.4914	1.47002	1.35591
								NDUFB8	0.858817	1.20616	0.984021	0.491398	0.470015	0.355914
M-OCR
	WT					ACE2-/y
0	291	186	213	211		72	218	166	200	144
7	288	188	213	218		71	206	161	193	129
14	284	187	212	217		77	200	156	191	121
21	197	121	139	164		45	123	112	130
28	199	125	144	153		50	123	122	131	100
35	207	133	149	159		50	128	129	141	97
43	510	237	312	361		91	296	225	225	146
50	459	222	294	323		95	290	205	200	150
58	421	217	273	310		96	271	199	188	137
65	143	106	95	137		46	115	88	81	74
73	145	105	99	128		48	114	88	85	71
81	143	100	97	128		43	114	87	86	68
