# Supplementary material for: ACE2 pathway regulates thermogenesis and energy metabolism
Source: eLife. 2022 Jan 11;11:e72266. doi: 10.7554/eLife.72266 (PMC8776250; doi:10.7554/eLife.72266)
Supplement: Figure 3—figure supplement 1—source data 1. [file elife-72266-fig3-figsupp1-data1.xlsx]

## Sheet: Sheet1
Figure 3-figure supplement 1
A-ACE2 immunoblot			B- IPGTT											B- AUC
db/db+GFP	db/db+ACE2			db/db+GFP				db/db+ACE2						db/db+GFP	db/db+ACE2
0.964607	3.84652		0	3.8	4.6	9.6		5	4.7	11.1	6.1	15.1		3485	3007
0.763623	3.57921		15	28.2	27.3	21.8		35	31.3	20.9	15.9	22.2		2950	2966
1.10356	2.22341		30	31.3	28.3	23.3		30.7	31.2	24.6	17.4	24.4		2614	2173
			60	31.5	22.4	23.3		22.7	24.7	18.3	18.7	17.8			1949
			120	30.4	28.7	21.4		24.4	21.6	13.3	14.4	14.9			2243
C- TG			D- TC			E- Food intake			F- Drink intake			G- Activity
db/db+GFP	db/db+ACE2		db/db+GFP	db/db+ACE2		db/db+GFP	db/db+ACE2		db/db+GFP	db/db+ACE2		db/db+GFP	db/db+ACE2
1.6926	1.3216		5.633	5.679		8.08	8.28		5.44	4.88		461.525	360.915
1.5064	1.435		5.263	5.241		10.86	10.46		4.32	6.48		434.102	293.186
1.5358	1.183		4.969	4.983		6.92	7.02		4.26	5.2		459.017	353.458
1.2012	1.0822		6.714	4.041		6.68	6.92		4.96	5.94		351.424	343.831
1.526	1.015		4.482	3.679			5.8			4.42			446.881
							8.64			4.58			538.881
I- Core body temperature
	C57BL/6						db/db mice
0	35	35.8	34.7	36.1	36.9		35.2	36.3	36.5	35.8	34.4
1	31.2	32.7	33.7	33.6	33.3		33	33.1	34.3	32.8	29.5
2	28.8	31.8	31.5	34	32.2		31.2	30.9	30.2	29.8	28
3	29.1	30.9	33.5	31.7	29.1		28.1	26.8	26.5	26.1	24.1
J- Core body temperature
	db/db+ACE2								db/db+GFP
0	34.6	34.6	35.1	34.8	34.5	35.3	35		34.3	35.5	35	34.7
1	30.7	31.4	31.3	30.3	30.2	32.1	31.8		27.5	29.5	29.1	26.4
2	28.8	31.1	30.7	29.4	30.1	31.1	31.4		27.3	30.3	29.7	29
3	29.8	30.5	30.6	29.8	29.3	28.4	30.1		26.1	29.1	29.2	28.8
K- Core body temperature
	HFD+ACE2							HFD+GFP
0	35.8	35.8	35.9	36.1	35.9	35.7		35.5	36	35.9	36.1	35.8	35.8	35.8
1	34.7	34.2	34	33.6	33.4	34.2		33.6	33.7	33.7	33.5	33.6	33.5	33.8
2	34.7	33.2	33.8	33	33.7	33.4		32.3	33.3	32.9	32.8	32.7	31.5	32.6
3	33.8	32.2	33	32.5	33	32.8		31.5	32.7	32	31.9	31.9	30.7	31.9
