# Supplementary material for: ACE2 pathway regulates thermogenesis and energy metabolism
Source: eLife. 2022 Jan 11;11:e72266. doi: 10.7554/eLife.72266 (PMC8776250; doi:10.7554/eLife.72266)
Supplement: Figure 3—source data 1. [file elife-72266-fig3-data1.xlsx]

## Sheet: Sheet2
Figure 3:
A- Ang-(1-7)			B- Body weight			C- VO2													D- VCO2
db/db+GFP	db/db+ACE2		db/db+GFP	db/db+ACE2		Time	db/db+GFP					db/db+ACE2								db/db-GFP						db/db-ACE2
174.233	335.67		38.6	35.2		1	28.2947	41.0211	45.1263	28.9895		62.4221	62.9767	34.4211	46.8632	32.7474	59.2611		Full day	37.2304	37.7659	43.5321	47.3641			56.7799	54.7915	46.9813	39.8627	64.9853
191.636	270.41		33.6	36.4		2	51.6	45.4421	26.3368	48.7895		52.4526	63.8021	51.0947	60.6632	56.7158	57.6821		Light	34.2164	38.1333	39.3907	44.7474			52.1814	44.6555	47.5868	35.4063	70.4429
182.108	306.922		30.7	30.7		3	33.7263	51.7895	52.3579	37.5474		52.0105	70.8695	49.0421	57.2842	58.1274	43.3895		Dark	39.7421	38.4395	34.4211	49.5446			60.6121	63.2382	46.2546	43.5763	59.5278
172.181	305.069		32.8	35.9		4	52.8947	48.3474	43.7368	32.6842		54.3	62.9084	53.2421	62.4347	56.9937	38.9368
244.003	311.249			33.4		5	41.5579	52.5158	50.9368	40.8316		60.1989	76.8284	33.1579	64.7305	57.3505	56.2737
255.756	217.433			30.2		6	28.3579	46.9263	40.1368	40.8316		46.8316	80.9463	44.1158	60.0442	51.1263	46.4842
	275.445					7	47.0211	48.8842	40.0105	38.7789		55.5789	76.7495	26.4	55.6421	45.6632	45.1514
						8	47.3368	37.2	36.5684	34.6421		37.5474	66.0632	22.6989	58.32	65.0179	40.7053
						9	30.9474	47.4316	41.7158	34.0105		52.4211	50.9368	44.1158	50.6211	48.9158	32.6211
						10	41.3333	35.4	34.8	43.0105		45.7579	54	37.3895	63.4042	59.5737	38.2737
						11	39.3789	46.5789	26.2421	37.2632		58.2	58.1053	55.2316	33.5684	48.3158	40.0421
						12	63.2432	54.3474	40.2947	40.3895		51.6947	63.0158	49.3895	56.4726	43.4211	39.4421
						13	42	28.1684	23.4	15.6221		48.4421	38.1474	50.0211	44.1474	56.1333	45.3
						14	51.4737	48.9158	32.2737	39.9789		36.6	59.6274	38.1474	45.5368	48.4737	42.0632
						15	27.1579	53.9053	32.2737	37.7684		50.7158	64.9768	49.4211	45.6947	37.6105	44.5263
						16	39.4421	41.3053	40.2	39.1263		52.4526	57.1	40.4526	36.0316	41.6526	39.6
						17	55.8316	42.5368	33.5368	40.4842		51.5368	67.7653	42.7895	49.5789	27.8842	40.8947
						18	34.5158	37.9263	39.2211	37.0737		51.6	64.4433	38.6667	47.2421	45.1895	44.9684
						19	36.2842	37.4333	24.9789	38.7474		51.9474	64.69	43.9263	58.6421	44.7789	34.8947
						20	31.5789	50.8737	30.0632	41.7158		59.5863	70.5505	34.1053	72.2463	34.6737	67.1558
						21	39.1263	42.1895	43.8947	48.4737		70.2632	89.2895	31.7053	57.4105	54.9474	48.8526
						22	33.4105	50.2105	28.7053	38.5895		62.8168	86.3242	45.6632	73.3642	52.9895	44.8737
						23	33.1579	57.2526	34.2632	53.0842		63.6	69.49	51.3789	72.6442	45.2526	54.9158
						24	28.4211	44.1158	47.6211	31.0737		61.1179	75.8211	52.2632	58.4716	60.0979	39.6316
E- EE														F- Core body temperature									H- SUV			I- UCP1 level
	db/db-GFP						db/db-ACE2						30C	db/db+GFP	db/db+ACE2	22C	db/db+GFP	db/db+ACE2	4C	db/db+GFP	db/db+ACE2		db/db+GFP	db/db+ACE2		db/db+GFP	db/db+ACE2
Full day	4.04181	4.04181	1.82023	4.88166			5.82504	5.84654	4.74372	4.67204	6.79539			37.1	36.7		33.2	33.7		29.1	31.3		0.0245	0.3242		0.8644	2.3245
Light	2.17429	2.17429	3.97306	2.6583			3.05503	2.81981	2.02636	2.38938	3.18056			36.5	36.5		32.9	34.1		28.5	31.1		0.0436	0.30787		1.276	3.7322
Dark	1.81677	1.81677	2.08233	2.17415			2.66742	2.83133	2.72136	2.17753	3.52541			36.1	36.1		32.6	34.2		27.3	29.9		0.03566	0.585		0.9533	2.9737
														36.2	37.2		33.1	33.6		28.1	30.3		0.02675	0.26465		0.9743	1.5389
														36.5	36.2		32.5	35		28.2	31.3					1.4576	2.4736
J- immunoblot								K- mRNA
	db/db+GFP			db/db+ACE2					db/db+GFP							db/db+ACE2
UCP1	2.08777	1.92557	1.64048	2.48887	3.34236	3.26864		UCP1	1.02751	1.02041	0.952078	1.02557	0.990636			1.31625	2.24641	2.95028	2.4919	2.99753	1.33462
PGC-1α	1.02225	0.881439	0.799587	1.37299	1.28724	0.969569		Cidea	1.02547	0.970157	1.00437	1.03492	0.972327			1.04702	0.810166	0.939206	0.623955	0.795268	1.17244
ATP5A	0.904939	0.72657	0.895074	1.10867	1.3124	1.27767		ATPsyn	0.785199	1.0652	1.1496	0.983793	0.990636			4.66258	3.97548	0.620339	0.737712	1.10682	1.17807
UQCRC2	1.49773	1.55469	1.44049	2.36885	2.31913	2.28297		COX4	1.06613	1.00862	1.00862	0.994736	0.947623			1.39705	1.3683	0.802396	0.934577	1.17478	1.2078
SDHB	0.79599	0.533825	0.68044	0.559544	0.697202	0.640956		COX8b	1.15772	1.02192	1.0434	0.92101	0.960121			5.35649	5.86158	1.53825	1.62596
NDUFB8	0.599	0.33825	0.28044	0.595	0.47202	0.43956		COX7a	1.289	1.35309	1.41055	0.66723	0.644502			39.5678	31.9171	8.5345	3.49184
								AP2	0.712812	1.77965	0.50754	1.2186	0.982975			30.7768	26.9384	0.936419	1.05353	17.65	17.6821
								MCAD	0.977014	1.00448	1.0185	1.0512	1.00141			0.950298	0.85054	0.367662	0.335981	0.8022	0.796659
								CPT-1α	0.835938	1.19042	0.973645	1.02427	1.09021			51.5791	52.7635	0.652749	40.9162	57.7469	55.5751
								PRDM16	0.906392	0.938356	1.15525	0.950955	1.08482			10.4701	9.97424	2.3105	2.47634	1.33556	0.970937
								PGC-1α	1.01385	1.00684	0.979311	0.979216	1.0279			2.0847	2.01369	2.0847	1.8023	2.78891	3.43355
								PGC-1β	0.938584	1.04142	1.01999	0.97788	0.875227			2.05417	1.72735	0.685563	0.881315	3.72626	1.41199
								PPARγ	1.06088	0.983	0.956119	1.08603	1.0133			0.917171	1.11362	0.602513	0.462994	0.6281	0.932428
