# Supplementary material for: ACE2 pathway regulates thermogenesis and energy metabolism
Source: eLife. 2022 Jan 11;11:e72266. doi: 10.7554/eLife.72266 (PMC8776250; doi:10.7554/eLife.72266)
Supplement: Figure 4—figure supplement 1—source data 1. [file elife-72266-fig4-figsupp1-data1.xlsx]

## Sheet: Sheet1
Figure 4-figure supplement 1
A-Ang-(1-7)			B- IPGTT												B- AUC
db/db+Vehicle	db/db+Ang-(1-7)			db/db+Vehicle					db/db+Ang-(1-7)						db/db+Vehicle	db/db+Ang-(1-7)
151.057	260.33		0	11.1	7.6	7.3	8.1		7	7.5	7.1	7.4	7.7		2330	1363
124.355	283.72		15	26.4	18.9	23.1	28.8		19.6	13.8	15.5	15.3	13.9		2300	1163
183.206	298.684		30	28	25.7	27.2	32.9		21.4	23.4	24.1	20.6	21.2		2210	1333
175.692	248.336		60	22.2	21.7	23	18		18.2	16	21.6	15.3	17.2		2536	2017
85.6092	341.515		120	18.7	16.6	17.1	15.9		16.2	15.7	13.8	16.3	10.4			1800
157.781	274.625
	295.466
	209.885
C- TG			D- TC			E- Food intake			F- Drink intake			G- Activity
db/db+Vehicle	db/db+Ang-(1-7)		db/db+Vehicle	db/db+Ang-(1-7)		db/db+Vehicle	db/db+Ang-(1-7)		db/db+Vehicle	db/db+Ang-(1-7)		db/db+NaCl	db/db+Ang-(1-7)
1.409	1.144		5.633	6.679		7.26	8.04		3.68	6.76		343.435	409.313
1.276	1.225		5.263	4.241		5.86	5.84		5.52	7.92		420.916	252.099
1.397	0.845		6.969	6.983		6.66	7.2		5.88	6.02		328.702	233.588
1.858	0.873		6.714	5.041		6.86	5.76		4.74	4.8		385.191	386.374
1.29	0.925		7.482	5.679			6.22			3.84			434.656
							4.68			3.96			434.58
H- Core body temperature
	db/db+Vehicle						db/db+Ang-(1-7)
0	34.9	35.2	35	34.5	35.4		35.2	35.4	35.9	35.5	36.3	35.4
1	29.7	29.9	29.9	27.7	28.2		31.1	31.6	29.8	31	31.4	30.5
2	27.8	24.7	28.6	25.2	24.8		29.3	27.3	27.2	27.3	29.9	29
3	27.3	24	27.9	23.6	23.9		27.2	28	24.7	25.8	28.1	25.1
I- mRNA
	db/db+Vehicle						db/db+Ang-(1-7)
UCP1	1.42	1.37	0.68	1.05373	0.956276		4.85	4.59	11.37	11.06	2.70476	2.91905
PRDM16	1.46	0.19	0.78	1.05146	1.08854		0.15	0.09	0.17	0.08	1.18296	0.954223
PGC-1α	0.770569	0.749498	1.28699	0.944079	1.092		1.91056	1.46815	3.3799	3.45092
PGC-1β	1.36	1.03	0.91	1.23854	0.822817		0.35	0.27	0.94	0.94	1.04149	1.29114
PPARγ	0.26	5.66	2.7	0.96138	0.903238		0.85	0.57	0.52	0.54	2.36719	1.80648
Cidea	0.78	0.92	0.8	0.978836	1.04909		5.25	5.55	12.94	11.66	1.07113	0.972074
ATPsyn	0.787527	0.910923	1.46958	0.973323	1.07997		1.24436	1.35229	8.90985	7.97454	2.58648	2.55087
COX4	1.11178	0.878355	1.16706	1.10148	0.972283		0.967863	1.08138	5.74726	5.74726	2.96791	2.82735
COX8b	1.36757	1.35812	0.683783	0.977553	1.12291		0.629209	0.633586	6.55053	5.86289	1.0998	1.11516
COX7a	1.63685	1.29318	0.62025	0.915029	1.18254		0.582739	0.566804	3.18418	3.43646	1.79239	1.50722
MCAD	1.27656	1.19936	0.97418	0.902591	1.09592		1.86899	1.85608	7.73961	7.32211	2.08803	2.05929
AP2	0.41	0.29	1.21	0.937965	1.07744		1.26	1.46	1.81	3.7002	3.77795
CPT-1α	0.07	0.46	0.28	1.1246	1.03484		0.22	3.71	0.17	0.13	0.97226	0.979022
