# Supplementary material for: ACE2 pathway regulates thermogenesis and energy metabolism
Source: eLife. 2022 Jan 11;11:e72266. doi: 10.7554/eLife.72266 (PMC8776250; doi:10.7554/eLife.72266)
Supplement: Figure 5—figure supplement 1—source data 1. [file elife-72266-fig5-figsupp1-data1.xlsx]

## Sheet: Sheet1
Figure 5-figure supplement 1
A- IPGTT																	A- AUC
	Mas-/-										WT						WT	Mas-/-
0	9.8	8.5	8.6	10.7	11.9	10.1	10.7	10.2	9.2	9.7	10.5	10.8	10.2	10.2	9.2		2155	2284
15	23.2	16.2	19.2	20.8	18.5	19	19.4	19.2	21.1	18.8	19.5	19.6	16.1	17.3	16.4		1998	2169
30	22.3	22.3	23.3	22.2	24.7	21.7	23.6	24.7	23.5	26.1	21.8	22.2	17.1	20.7	21.9		1817	2126
60	20.4	17.3	20.2	20.2	19.3	21.4	20.5	21.9	21.4	21.4	17.6	16.3	16.7	16.9	15.6		1970	2032
120	16	14.7	15.1	13.7	16	15.8	17.1	14.6	16.4	14.2	16.2	13.5	10.8	13.1	13.4		1979	2061
																		2256
																		2263
																		2254
																		2392
																		2354
B- TG			C- TC			D- VO2												E- Food intake			F- Drink intake			G- Activity
WT	Mas-/-		WT	Mas-/-		Time	WT					Mas-/-						WT	Mas-/-		WT	Mas-/-		WT	Mas-/-
1.12	1.33		3.8	5.4		1	71.4759	112.307	65.9842	63.567	88.1808	86.8104	64.8295	72.1711	91.602	70.6436		3.92	4.56		2.94	3.04		315.234	253.125
1.26	1.19		3.8	6.9		2	73.0672	94.4319	69.1918	63.936	82.9632	78.719	67.7947	65.125	82.5006	71.3167		3.76	4.22		3	3.44		324.219	202.578
1.05	1.33		3.4	5		3	71.54	107.16	67.6026	62.0595	84.6672	85.8946	63.27	59.1518	84.903	70.0301		4.7	4.98		3.62	3.46		254.922	221.836
1.12	1.47		3.4	5.3		4	64.865	91.5021	69.8382	64.9395	78.2208	91.2427	68.7352	69.0622	94.542	72.9695		3.3	5.5		3.22	3.38		329.766	354.258
						5	66.4563	107.342	72.7639	63.2295	82.2768	71.8848	59.7337	56.8752	87.5028	72.9653		4.96	4.38		3.52	3.96		343.633	340.859
						6	74.6746	109.936	72.2245	70.155	86.832	89.4456	61.8097	62.6525	84.4032	75.1123									434.58
						7	57.3463	93.0981	70.7567	59.9715	70.9008	78.4555	61.69	58.8295	81.3288	67.3804
						8	83.7899	100.622	72.5258	73.179	87.6384	85.6829	57.9553	59.2783	87.7926	69.7021
						9	78.2897	103.022	69.6146	64.575	82.6032	78.9048	57.6133	61.9262	76.6416	65.7744
						10	72.0152	97.3959	62.8398	66.4605	80.7312	79.9632	55.469	65.329	85.218	66.0598
						11	60.5396	100.753	67.5977	57.258	71.4432	75.1594	60.3151	61.0776	85.533	73.0633
						12	62.4513	95.4693	66.8736	70.8165	72.792	74.5978	58.5983	63.7582	92.7738	65.6125
						13	60.593	100.884	65.8773	60.4215	72.4848	77.8464	61.6284	62.065	83.4204	66.5795
						14	60.6731	100.206	61.3818	60.201	73.1328	72.9821	51.6317	64.5864	90.1446	64.4155
						15	57.9123	105.336	63.3501	59.328	69.1872	76.1832	61.8712	61.4774	84.1176	62.4644
						16	66.4243	95.2242	58.7866	59.7555	65.4	77.1034	49.4977	63.3012	73.5882	64.1343
						17	56.7642	108.807	61.4012	53.6265	76.8	76.1141	58.2152	63.1135	74.1258	69.11
						18	56.9084	92.5338	59.258	62.8065	71.064	75.2026	50.8554	63.342	88.557	63.3632
						19	63.813	91.7016	64.5505	58.23	70.7232	79.1899	60.0997	64.3702	83.1138	66.4688
						20	67.7593	109.959	71.1212	60.7815	77.1264	79.7731	52.2713	62.5342	81.711	68.0663
						21	70.189	105.57	72.3897	67.464	80.8368	76.4424	55.9375	60.2453	80.934	69.1994
						22	75.1552	104.048	74.5378	64.0665	83.7696	84.7627	55.9273	65.8879	83.727	73.1442
						23	80.634	111.577	73.075	52.443	82.824	69.241	65.1647	66.3653	79.5312	74.009
						24	66.8408	93.1494	70.3971	69.039	83.0832	85.225	57.9553	59.0131	82.6014	72.2879
H- Food intake				I- Drink intake				J- Activity
WT BAT	Mas-/- BAT	WT eWAT		WT BAT	Mas-/- BAT	WT eWAT		WT BAT	Mas-/- BAT	WT eWAT
4.9	5.6	4.9		5.6	2.8	11.55		141.804	363.859	117.016
5.95	7	3.85		6.28	2.45	4.2		110.053	425.928	182.109
5.25	2.45	4.2		11.9	3.96	3.85		192.255	58.9655	58.7268
3.85	6.3	3.85		2.8	9.8	5.73		811.194	132.692	432.215
