# Supplementary material for: ACE2 pathway regulates thermogenesis and energy metabolism
Source: eLife. 2022 Jan 11;11:e72266. doi: 10.7554/eLife.72266 (PMC8776250; doi:10.7554/eLife.72266)
Supplement: Figure 5—source data 1. [file elife-72266-fig5-data1.xlsx]

## Sheet: Sheet1
Figure 5
A-Ang-(1-7)			B- Body weight			C- Core body temperature												E- SUV				F- Core body temperature
WT	Mas-/-		WT	Mas-/-			WT					Mas-/-						WT	Mas-/-			Mas-/-						WT
761.92	932.1		32.1	39.9		30°C	36.7	37	36.9	36.7	36.7	36.5	36.2	36.9	36.2	36.8		1.3	0.7		0	36.5	36.6	36.9	36.7	36.4		36.7	36.7	36.6	36.3
640.1	1273.02		33.8	43.6		22°C	36.6	36.9	37	36.8	36.9	35.2	34.2	36	35	34.8		0.9	0.4		1	31.8	33.2	32.3	32.5	32.3		33.4	32.3	33.1	33.2
501.28	790.58		31.2	35.4		4°C	33	32.9	33.1	33.3	32.1	29.9	30.8	31.6	30.8	31.5		1.2	0.5		2	31	32.4	31.9	31.7	31.4		33.1	32.4	33	33
611.64			34.6	34.5																	3	30.4	31.5	31.5	32	30.8		32.4	31.8	32.5	32
483.14				36.3
G- UCP1 level			H- immunoblot								I- mRNA
WT	Mas-/-			WT			Mas-/-					WT						Mas-/-
0.9644	0.4332		UCP1	1.08919	1.12748	0.783332	0.330237	0.353951	0.35112		UCP1	1.21267	0.912687	0.991848	1.00569	0.919035		0.605394	0.549406	0.791312	0.791312
1.276	0.5673		PGC-1α	0.663157	1.1403	1.19655	0.956431	0.547938	0.464526		PRDM16	1.24	1.0072	0.752802	1.22127	1.02696		0.0356573	0.0332695	0.320496	0.290856	0.702224	1.10957
0.975	0.3964		ATP5A	1.05007	1.03552	0.914412	0.719629	0.789835	0.993467		PGC-1α	1.06088	0.956119	0.983	1.02547	1.12997		0.471811	0.509192	0.680781	0.69992
0.874	0.6323		UQCRC2	1.03152	1.16618	0.802306	0.110867	0.102097	0.201772		PGC-1β	1.03022	0.974649	0.995129	0.977886	0.944576		0.533276	0.599967	0.506186	0.459373	0.852635	1.05702
0.7487	0.2113		SDHB	1.12089	1.08528	0.793825	0.064017	0.066467	0.090229		PPARγ	1.0484	1.01973	0.931864	0.966016	1.09438		0.422842	0.440799	0.190798	0.173153	1.56917	1.0943
			NDUFB8	1.12089	0.885281	0.693825	0.034017	0.026467	0.010229		Cidea	1.04696	0.838688	1.11435	1.21664	0.934911		0.177133	0.189846	0.304857	0.251078	1.78485	1.6769
											ATPsyn	1.07525	0.849494	1.07525	1	1.40444		0.111878	0.102238	0.215338	0.286117	0.647962	0.968606
											COX4	1.10819	1.10053	1.0557	0.978202	0.893911		1.04117	1.10819	0.751687	0.711139	0.850929	0.82766
											COX8b	1.26345	0.964177	0.772373	1	1		0.747425	0.742262	0.697372	0.721965	1.43134	1.10755
											COX7a	1.27774	1.08192	1.09702	0.897257	0.842994		0.63887	0.792012	0.579786	0.583819	0.717259	0.678569
											MCAD	1.15168	1.04517	0.803149	1.05837	0.994363		1.00549	1.50915	1.05384	1.36779	1.32383	1.00328
											AP2	1.1504	0.934415	0.915185	0.967903	1.00901		0.68879	0.796715	0.957584	0.967903	0.870551	1.94531
											CPT-1α	1.16002	1.24328	1.23469	1.16255	0.839321		0.243863	0.22285	0.101341	0.105645	1.26576	0.716978
J- IPGTT																							Q- AUC
	WT-BAT							Mas-/-- BAT								WT-eWAT							WT BAT	Mas-/-- BAT	WT-eWAT
0	5.9	5.3	5.1	4.4	6.2	9.1		7	6.1	6.2	6	7.9	7.2	6.2		8.9	7.2	7.2	7.9	7.7	4.5		1877.3	2248.5	2277.8
15	13.2	19.7	15.5	12.2	17.9	17.7		17.6	21.7	15.2	15.1	18.2	14.8	14.9		21.8	27.6	19	19.4	16.25	15.8		2034	2374.5	2920.5
30	18.2	21.3	20.2	23.5	22.1	20.3		21.1	23.4	23.9	21.5	24.6	24.5	21.8		22.8	30.9	29.4	23.9	27.7	22.6		1929	2094	2317.5
60	23.6	21.6	20.8	19.2	27.1	22.2		27.1	25.9	23.8	29.4	27.1	30	27.2		27.1	31.9	21.8	24	26.7	25.3		1894.5	2160.8	2366.3
120	18.8	17.6	20.8	20.4	15.4	14.2		23.6	24.1	18.3	16.6	19	19.9	22.8		14.9	24.1	20	28.9	27	21.3		2156.3	2304.8	2460.4
																							1954.5	2320.5	2145.8
																								2193.8
K- ITT																					R- AUC
	WT BAT							Mas-/-- BAT						WT-eWAT							WT BAT	Mas-/--BAT	WT-eWAT
0	5.6	6.2	6.3	11.7	7.4	5.9		10.4	9.8	11.9	8.2	9.3		10.3	7.8	10.9	12.1	8.4	8.8		310.5	518.3	666.8
15	3.6	4	3.4	7.7	7.1	3.4		7.5	7.8	4.9	6.9	5.4		9.8	7.4	8.9	7.2	6.1	8.1		318	535.5	466.5
30	2.6	2.6	3.3	2.9	3.3	2.1		3.6	5.6	3	3.2	3.2		5	3.5	3.9	3.4	3.3	3.6		284.3	411	595.5
45	2.4	2.3	1.4	3.4	3.3	2.3		3.8	2.6	2.6	2.9	3.1		4.4	2.9	4.3	2.7	2.6	3.5		496.5	446.3	474.8
60	2.5	2.3	1.3	3.1	3.1	2.6		3.3	2.7	2.9	3.1	3.3		5.8	3.3	4.5	2.6	2.8	3.3		459.8	429.8	419.3
																					291.8		510.8
L- Body weight
	WT BAT										Mas-/-- BAT										WT-eWAT
0	24.4	23.9	24.7	23.5	23.9	23.9	27.1	22.7	23.8	24.6	27	25.1	25.4	23.3	24.9	24.5	25.3	25.6	25.8	25.2	24.7	24.6	25.9	26.3	25.7	23.8	25.2	24.3	24.8	26
1	25.7	25.4	26	26.8	26.7	25.6	26	24.3	26.1	29.6	28.2	30.2	28.3	26.4	27	28.5	26.6	27.4	29.5	27.4	28.6	29	28.3	30.8	27.4	27.5	26.6	28.2	24.6	30.8
2	27.3	27.9	27.1	27.8	27.3	26.3	26.9	26.1	31.7	27.7	29.6	29.3	31.4	26.9	27.2	28.9	27.6	29.6	30.4	26.7	29.7	30.2	30.5	32.2	29.6	32.4	25.9	29.3	28.4	30.2
3	30.4	30.4	29.2	28.9	30.8	26.3	27.3	29.2	30.3	37	29	31	33.6	31	30.7	31.7	31.8	30.4	31.3	30	31.4	29.9	31.9	28.7	30.5	28.1	31.2			30.2
5	30.8	30.5	28.9	29.5	30.4	29	27.2	29.2	26.5	36.9	31.5	29.6	30.3	34	31	31.2	30.4	30.4	32.6	31.3	32.1	31	34	30.4	30.2	32.1	31	34	30.4	30.2
6	31.4	29.7	30.2	30.5	31.6	25.6	22.9	34.7	23.6	24.9	31.2	30.9	28.9	34.2	31.9	32.1	29.8	31.2	31	32	33.3	32.5	31.2	30.8	32.8	29.9	32.5	29.6	32.2	30.4
7	28.7	27.9	28.8	29.1	28.7	26.8	27.9		28	24.9	29.7	28.6	32.6	31.6	29.1	27.9	29	30.2	31.6	32.2	33.9	29	31.3	29.7	31.4	29.9	29.2	31.5	28.1	31
8	30.8	30.3	30.9	29.9	31.3	34	21	26.6	29.5	27	33.5	30.1	37	35.7	32.9	32.8	36.4	35.7	32.2	34.7	32.8	36.4	35.7	32.2	34.7	31.6	33.1	36.1	31.4	29
9	21.1	27.5	30.9	28.4	37.2	32.5	31.2	30.5	32.4	31	35.2	39.2	34.5	31.4	37.4	33.5	33.6	37.2	35.7	34.4	37.7	33.9	37.9	36.6	34.1	33.5	38.6	29.7	35.3	32.2
10	31.4	31.3	33.1	32	31.4	20.9	31.8	28.4	30	40.6	37.3	37.8	35.4	34.9	38.4	35.6	31.7	37.1	33.1	35.2	34.9	36.6	38.7	34.8	38.9	31.9	30.2	33.7	39.3	35.2
M- VO2																N- VCO2
Time	WT BAT					Mas-/-- BAT					WT-eWAT						WT BAT						Mas-/-- BAT						WT-eWAT
1	53.7755	66.5456	59.7564	65.4214	68.4998	63.6008	69.835	68.19	46.2255	44.0982	56.6849	57.6316	53.4813	41.8215	49.3266	Full day	46.8667	44.2064	35.3691	48.2227	53.9026		40.8831	42.7172	41.5507	32.9067	28.2739		41.0716	44.4862	43.0669	33.5632	40.2425
2	64.999	65.9692	41.0652	69.8029	67.1276	49.9048	67.9723	49.49	41.1894	43.1583	53.5748	67.3348	53.4608	41.9489	57.7695	Light	40.4322	37.1541	35.3856	44.8806	52.1533		42.9661	40.2455	43.6815	34.0721	27.6316		38.7259	37.8638	44.3665	33.6939	35.3691
3	69.7177	69.0096	46.0598	58.7418	67.416	61.1441	67.0504	47.94	33.7723	29.7394	50.3474	63.3516	51.6979	49.4459	52.3698	Dark	52.2287	49.4956	35.3554	51.0078	55.3603		39.1474	46.6102	39.775	31.9355	28.8091		43.0263	50.0049	41.9838	33.4543	44.3038
4	71.5743	74.5888	49.2129	67.7645	80.1851	47.8033	67.9349	56.05	58.4092	41.6111	55.5015	65.2496	46.2506	44.1392	54.8025
5	67.6053	75.5128	48.6783	67.2941	70.4575	53.9879	68.0378	51.68	53.7706	30.6986	50.68	62.0776	40.3281	43.3111	49.5412
6	68.1477	68.068	50.6682	66.8998	78.6862	53.9152	73.256	46.68	52.8566	41.8521	50.5039	61.3236	53.006	46.6333	47.0656
7	57.0698	66.9196	50.193	66.1024	69.9943	51.1546	64.7946	41.45	57.8379	36.1163	50.7826	61.5316	44.8607	47.971	50.4905
8	64.0288	63.1576	42.7581	58.8941	71.4233	51.0433	59.6279	49.005	49.7445	18.2823	44.6213	58.8692	51.2431	40.8219	47.5569
9	60.7433	68.6048	43.3175	55.8029	75.1553	46.896	61.2238	44.575	48.1815	27.2764	44.9	64.6516	41.3808	35.5397	40.0728
10	57.8813	43.956	52.3809	66.0173	67.818	58.88	54.5735	66.14	44.9368	39.0468	41.6481	51.3812	55.0807	38.5679	41.6326
11	58.6221	42.7416	38.2338	64.7315	68.1064	59.3764	53.0899	61.595	41.4271	41.158	53.2961	44.2104	48.1617	47.5594	45.6012
12	55.0721	53.3104	42.763	62.8813	68.5435	56.3034	59.6045	60.695	48.0992	36.1355	43.2618	46.774	49.6641	43.0955	43.6932
13	54.587	25.9248	45.0994	53.8272	77.7816	55.5244	52.0603	62.8	44.4478	42.4883	41.7264	44.252	54.5084	41.3364	39.0902
14	59.7996	54.0804	46.3865	53.8765	64.6979	56.389	51.6485	64.32	44.2787	38.3865	44.8266	50.3828	49.5517	51.4745	39.8056
15	62.2692	40.326	44.5549	63.177	71.7467	45.368	49.3038	58.25	44.626	33.846	41.032	50.0188	53.0265	34.6626	44.3181
16	53.8902	57.4552	45.4361	55.337	59.5937	55.426	56.9743	59.535	44.9734	37.2104	46.7386	46.2124	52.8527	45.5112	45.1147
17	56.6376	57.926	41.1593	57.8458	66.1705	61.1398	58.1958	53.195	44.6398	35.1041	48.4892	48.5212	51.284	49.9849	45.8588
18	55.4954	64.7724	46.0102	54.4454	67.215	43.5148	65.155	54.21	38.3057	36.2127	45.1591	48.8488	57.0123	41.0718	41.4895
19	60.2627	61.666	51.1681	55.9014	63.9113	51.176	59.4126	52.505	42.7112	34.7233	41.8046	54.3504	58.7701	40.817	45.4772
20	76.0901	68.1692	48.1487	57.8637	60.9484	60.532	67.9068	52.59	30.9892	35.5909	48.4257	52.078	51.2124	33.4817	43.822
21	58.212	62.6032	39.5654	61.143	61.6825	51.0647	59.656	56.78	47.2447	37.3984	52.4648	60.1744	54.7945	28.6846	44.2895
22	59.3277	71.962	41.6542	58.8224	63.684	56.1322	62.7243	56.66	35.774	34.1304	52.4941	59.2384	53.0571	46.9273	46.8223
23	76.9766	55.5588	37.8428	66.967	71.3927	45.9116	62.495	56.005	21.5521	41.987	47.5846	56.1392	54.1507	37.2155	52.7991
24	67.2569	67.3508	48.9406	65.6051	67.971	31.4837	66.2688	50.075	26.7619	46.084	41.7019	58.786	60.5228	32.9133	49.3456
V- EE
	WT BAT						Mas-/-- BAT						WT-eWAT
Full day	6.27357	5.95547	4.5762	6.14232	6.81019		5.35148	5.28067	5.59008	4.25873	3.74961		4.88823	5.55101	5.27955	4.20109	4.73805
Light	3.26965	2.95238	2.55633	3.34312	3.87056		3.1309	2.77054	3.32517	2.53708	2.08975		2.63306	2.81833	2.27105	2.45916	2.46691
Dark	2.8857	2.80589	1.99788	2.73665	2.93177		2.24792	2.39073	2.31397	1.76047	1.64003		2.19509	2.60005	3.00346	1.76389	2.18093
