# Supplementary material for: ACE2 pathway regulates thermogenesis and energy metabolism
Source: eLife. 2022 Jan 11;11:e72266. doi: 10.7554/eLife.72266 (PMC8776250; doi:10.7554/eLife.72266)
Supplement: Figure 6—source data 1. [file elife-72266-fig6-data1.xlsx]

## Sheet: Sheet1
Figure 6
A- cell size			B- mRNA
db/db+GFP	db/db+ACE2			db/db+GFP				db/db+ACE2
7232	5735		UCP1	1.10642	0.930385	0.963195		3.64495	3.30786	2.0342	5.83391	5.75359
7342	6535		Cidea	1.10128	1.03468	0.864046		0.338958	0.320674	0.10218	0.870384	0.965752
6854	5722		ATPsyn	0.999984	0.993077	1.00694		0.34388	1.43393	0.726975	0.779152	0.835075
7945	6631		COX4	0.999424	0.958711	1.04187		0.870049	0.811784	0.817431	1.18031	1.19679
8375	4264		COX8b	1.03259	0.990525	0.976888		0.97014	0.874339	1.30913	0.402278	0.39674
7543	7545		COX7a	1.03916	0.94306	1.01778		0.787538	0.804086	1.02638	1.03679	1.03094
	5153		AP2	1.07136	1.09387	0.834766		1.16261	1.15707	1.00861	1.03797	1.0302
			MCAD	1.06544	0.994091	0.940468		0.59109	0.470234	0.683707	1.58167	0.883591
			CPT-1α	0.781371	2.57412	1.24322		2.3039	1.89747	0.152658	0.184076	0.141451
				db/db+GFP				db/db+ACE2
			PRDM16	0.926161	1.13236	1.23242		1.14817	2.12776	0.971449	1.68353	1.94732
			PGC-1α	0.918806	1.01948	1.30218		0.97795	1.18742	4.44113	11.088	6.685
			PGC-1β	1.00049	1.03235	1.2231		1.59763	1.78501	0.966301	1.29284	1.45011
			PPARγ	1.08233	0.96202	1.12148		1.16808	1.27822	2.09276	1.00375	0.949609
C- cell size			D- mRNA
db/db+GFP	db/db+ACE2			db/db+Vehicle					db/db+Ang-(1-7)
7232	5735		UCP1	1.17104	1.40264	0.316032	0.275122		39.0741	37.2235	3.29012	2.9244
7342	6535		Cidea	1.78856	2.02624	0.21005	0.172995		3.86054	4.02448	0.434914	0.411454
6854	5722		ATPsyn	0.787527	0.910923	1.46958	0.983094		1.24436	1.35229	8.90985	7.97454
7945	6631		COX4	1.11178	0.878355	1.16706	0.922023		0.967863	1.08138	5.74726	5.74726
8375	4264		COX8b	1.36757	1.35812	0.683783	0.64243		0.629209	0.633586	6.55053	5.86289
7543	7545		COX7a	1.63685	1.29318	0.62025	0.651087		0.582739	0.566804	3.18418	3.43646
	5153		AP2	1.58433	1.87108	0.229072	0.250672		7.43263	8.65703	2.52078	2.81644
			MCAD	1.27656	1.19936	0.73319	0.633871		1.86899	1.85608	7.73961	7.32211
			CPT-1α	1.69126	1.82525	0.482331	0.313839		8.9265	8.7428	1.94274	1.64501
			PRDM16	1.13394	1.29356	1.17393	0.611889		22.3367	24.4429	0.883524	0.98715
			PGC-1α	1.62763	1.7811	0.337456	0.409738		4.73306	5.17936	0.797067	0.860217
			PGC-1β	1.43972	1.19399	0.244142	0.892419		20.6174	26.8303	1.4199	1.5646
			PPARγ	0.383744	1.04842	1.90292	1.04842		4.07901	3.4779	1.23818	2.9449
E- cell size			F- mRNA
db/db+GFP	db/db+ACE2			db/db+GFP					db/db+ACE2
6723	7736		UCP1	1.03006	1.00886	0.999216	0.145478		3.53749	3.18817	0.884373	0.164809
7824	6986		Cidea	1.03246	1.00422	0.648907	0.967919		0.416412	0.491779	1.65056	0.802714
7545	6034		AP2	1.07391	0.903046	0.82243	4.25148		3.92549	3.61218	0.825232	1.91582
8422	7487		CPT-1α	1.042	0.985788	1.00448	1.5762		3.38545	2.82715	0.913419	0.66732
9321	8045
8943	9466		PRDM16	0.978836	1.04909	1.22629	0.398955		2.94678	1.89099	0.602544	0.448847
	8843		PGC-1α	1.15274	0.904424	1.87264	1.02086		0.494853	0.433791	0.959126	4.88986
			PGC-1β	0.961111	1.01591	1.06642	1.03848		0.57148	0.825176	0.661802	0.68514
			PPARγ	1.07006	0.9984	0.705976	0.988		0.380954	0.394389	0.890435	1.65013
