# Supplementary material for: ACE2 pathway regulates thermogenesis and energy metabolism
Source: eLife. 2022 Jan 11;11:e72266. doi: 10.7554/eLife.72266 (PMC8776250; doi:10.7554/eLife.72266)
Supplement: Figure 7—figure supplement 1—source data 1. [file elife-72266-fig7-figsupp1-data1.xls]

## Sheet: Sheet1
GOID	GOTerm	QueryID	Symbol	Description	P-Value	FDR	Enrichment	AccID	Case	Control	FoldChange	Log2FC	P-Value2	FDR3	Style	ACE1	ACE2	ACE3	ACE4	WT_BS1	WT_BS2	WT_BS3	WT_BS4	Symbol4	KeggID	Description5
GO:0009615	response to virus	2010002M12Rik	2010002M12Rik	Protein 2010002M12Rik	3.34873e-17	4.9416e-14	4.67719	2010002M12Rik	40.326	1.93883	20.7991	4.37845	8.67934e-09	8.6402e-08	up	36	47	62	17	1	1	4	2	2010002M12Rik	mmu:112419	Protein 2010002M12Rik
GO:0009615	response to virus	Ace2	Ace2	Angiotensin I converting enzyme 2	3.34873e-17	4.9416e-14	4.67719	Ace2																Ace2	mmu:70008	Angiotensin I converting enzyme 2
GO:0009615	response to virus	Adar	Adar	Adenosine deaminase acting on RNA	3.34873e-17	4.9416e-14	4.67719	Adar	1631.85	377.473	4.3231	2.11206	2.28038e-54	5.48607e-52	up	1510	1896	1601	1418	424	365	472	302	Adar	mmu:56417	Adenosine deaminase acting on RNA
GO:0009615	response to virus	Bcl3	Bcl3	B-cell lymphoma 3 protein homolog	3.34873e-17	4.9416e-14	4.67719	Bcl3	435.205	210.465	2.06782	1.04811	1.65903e-15	3.97595e-14	up	450	481	434	354	198	209	234	230	Bcl3	mmu:12051	B-cell lymphoma 3 protein homolog
GO:0009615	response to virus	Bst2	Bst2	Bone marrow stromal antigen 2	3.34873e-17	4.9416e-14	4.67719	Bst2	3171.5	235.073	13.4916	3.75399	1.34548e-24	6.69706e-23	up	3149	2726	2761	3674	236	157	312	266	Bst2	mmu:69550	Bone marrow stromal antigen 2
GO:0009615	response to virus	Cdk6	Cdk6	Cyclin-dependent kinase 6	3.34873e-17	4.9416e-14	4.67719	Cdk6	227.283	87.6665	2.59258	1.37439	1.94552e-17	5.62521e-16	up	233	250	206	205	78	97	89	99	Cdk6	mmu:12571	Cyclin-dependent kinase 6
GO:0009615	response to virus	Clec5a	Clec5a	C-type lectin domain family 5 member A	3.34873e-17	4.9416e-14	4.67719	Clec5a	0.74214	14.2404	0.0521151	-4.26215	1.12294e-07	9.39458e-07	down	0	0	3	0	19	16	9	15	Clec5a	mmu:23845	C-type lectin domain family 5 member A
GO:0009615	response to virus	Clu	Clu	Clusterin	3.34873e-17	4.9416e-14	4.67719	Clu	2671.99	641.129	4.16764	2.05923	6.11776e-78	3.47878e-75	up	2647	2878	2728	2277	686	592	610	764	Clu	mmu:12759	Clusterin
GO:0009615	response to virus	Ddx58	Ddx58	Ddx58 protein	3.34873e-17	4.9416e-14	4.67719	Ddx58	2597.71	501.787	5.17691	2.37209	5.81259e-34	5.71064e-32	up	2383	3134	2838	1933	627	468	510	472	Ddx58	mmu:230073	Ddx58 protein
GO:0009615	response to virus	Ddx60	Ddx60	Protein Ddx60	3.34873e-17	4.9416e-14	4.67719	Ddx60	420.9	24.9433	16.8743	4.07675	1.13226e-35	1.20721e-33	up	381	534	470	287	22	16	36	29	Ddx60	mmu:234311	Protein Ddx60
GO:0009615	response to virus	Dhx58	Dhx58	Putative uncharacterized protein	3.34873e-17	4.9416e-14	4.67719	Dhx58	1751.15	274.582	6.37752	2.673	4.84579e-38	5.90463e-36	up	1561	2123	1908	1336	322	240	303	271	Dhx58	mmu:80861	Putative uncharacterized protein
GO:0009615	response to virus	Eif2ak2	Eif2ak2	Interferon-induced, double-stranded RNA-activated protein kinase	3.34873e-17	4.9416e-14	4.67719	Eif2ak2	1165.62	393.353	2.9633	1.56721	6.91485e-08	5.97409e-07	up	1192	1630	1088	738	484	357	429	358	Eif2ak2	mmu:19106	Interferon-induced, double-stranded RNA-activated protein kinase
GO:0009615	response to virus	Gm14446	Gm14446	RIKEN cDNA 2010002M12	3.34873e-17	4.9416e-14	4.67719	Gm14446	10.7808	3.14904	3.42353	1.77549	0.00554867	0.0166914	up	8	13	16	6	5	2	1	5	Gm14446	mmu:667373	RIKEN cDNA 2010002M12
GO:0009615	response to virus	Hmga2	Hmga2	High mobility group protein HMGI-C	3.34873e-17	4.9416e-14	4.67719	Hmga2	274.791	106.72	2.57488	1.36451	0.00332392	0.0107244	up	195	463	234	198	113	83	109	136	Hmga2	mmu:15364	High mobility group protein HMGI-C
GO:0009615	response to virus	Hspb1	Hspb1	Heat shock protein beta-1	3.34873e-17	4.9416e-14	4.67719	Hspb1	169.025	62.7967	2.69163	1.42848	3.69325e-07	2.80696e-06	up	184	184	111	181	60	69	57	74	Hspb1	mmu:15507	Heat shock protein beta-1
GO:0009615	response to virus	Ifi27l2a	Ifi27l2a	Interferon alpha-inducible protein 27-like protein 2A	3.34873e-17	4.9416e-14	4.67719	Ifi27l2a	1510.29	268.582	5.62318	2.49139	8.90555e-13	1.52475e-11	up	1733	1155	1274	1712	279	204	319	308	Ifi27l2a	mmu:76933	Interferon alpha-inducible protein 27-like protein 2A
GO:0009615	response to virus	Ifih1	Ifih1	Melanoma differentiation-associated protein 5	3.34873e-17	4.9416e-14	4.67719	Ifih1	1072.86	169.72	6.32135	2.66023	1.12241e-26	6.38241e-25	up	1082	1342	1141	705	193	178	184	148	Ifih1	mmu:71586	Melanoma differentiation-associated protein 5
GO:0009615	response to virus	Ifit1	Ifit1	Putative uncharacterized protein	3.34873e-17	4.9416e-14	4.67719	Ifit1	3784.68	172.258	21.971	4.45753	3.23762e-39	4.30879e-37	up	4176	4531	4182	2229	228	118	199	167	Ifit1	mmu:15957	Putative uncharacterized protein
GO:0009615	response to virus	Ifit2	Ifit2	Interferon-induced protein with tetratricopeptide repeats 2	3.34873e-17	4.9416e-14	4.67719	Ifit2	479.886	90.3587	5.3109	2.40896	4.54725e-34	4.53878e-32	up	548	553	487	322	101	87	96	90	Ifit2	mmu:15958	Interferon-induced protein with tetratricopeptide repeats 2
GO:0009615	response to virus	Ifit3	Ifit3	Ifit3 protein	3.34873e-17	4.9416e-14	4.67719	Ifit3	5593.72	183.031	30.5616	4.93365	4.89956e-38	5.93163e-36	up	5276	6984	6584	3448	166	164	224	203	Ifit3	mmu:15959	Ifit3 protein
GO:0009615	response to virus	Ifitm1	Ifitm1	Interferon-induced transmembrane protein 1	3.34873e-17	4.9416e-14	4.67719	Ifitm1	22.3952	5.30456	4.22188	2.07788	0.00705006	0.0205554	up	10	16	25	34	5	7	5	5	Ifitm1	mmu:68713	Interferon-induced transmembrane protein 1
GO:0009615	response to virus	Ifitm2	Ifitm2	Interferon-induced transmembrane protein 2	3.34873e-17	4.9416e-14	4.67719	Ifitm2	2684.62	1187.55	2.26064	1.17673	9.79556e-07	6.9051e-06	up	2826	2544	2094	2988	1113	1133	1176	1490	Ifitm2	mmu:80876	Interferon-induced transmembrane protein 2
GO:0009615	response to virus	Ifitm3	Ifitm3	Interferon-induced transmembrane protein 3	3.34873e-17	4.9416e-14	4.67719	Ifitm3	7810.7	1537.47	5.08022	2.34489	5.2065e-65	2.17111e-62	up	8052	8940	6806	6950	1640	1308	1704	1706	Ifitm3	mmu:66141	Interferon-induced transmembrane protein 3
GO:0009615	response to virus	Lcn2	Lcn2	Neutrophil gelatinase-associated lipocalin	3.34873e-17	4.9416e-14	4.67719	Lcn2	3410.56	901.584	3.78285	1.91947	2.1058e-27	1.28714e-25	up	3576	2799	3674	3309	1001	883	814	1033	Lcn2	mmu:16819	Neutrophil gelatinase-associated lipocalin
GO:0009615	response to virus	Mx1	Mx1	Myxovirus influenza virus resistance protein 1 isoform 1	3.34873e-17	4.9416e-14	4.67719	Mx1	334.057	6.72584	49.6677	5.63424	4.80435e-31	3.93684e-29	up	342	375	432	186	8	12	5	3	Mx1	mmu:17857	Myxovirus influenza virus resistance protein 1 isoform 1
GO:0009615	response to virus	Mx2	Mx2	Interferon-induced Mx2	3.34873e-17	4.9416e-14	4.67719	Mx2	593.043	42.8422	13.8425	3.79103	3.36928e-67	1.43692e-64	up	614	717	598	425	45	28	61	43	Mx2	mmu:17858	Interferon-induced Mx2
GO:0009615	response to virus	Oas1a	Oas1a	2'-5'-oligoadenylate synthase 1A	3.34873e-17	4.9416e-14	4.67719	Oas1a	340.006	7.51909	45.219	5.49886	7.43028e-56	1.96379e-53	up	262	403	350	318	8	2	14	7	Oas1a	mmu:246730	2'-5'-oligoadenylate synthase 1A
GO:0009615	response to virus	Oas1b	Oas1b	Inactive 2'-5'-oligoadenylate synthase 1B	3.34873e-17	4.9416e-14	4.67719	Oas1b	179.592	23.7114	7.57407	2.92107	2.77502e-13	5.03892e-12	up	143	241	213	117	36	14	29	19	Oas1b	mmu:23961	Inactive 2'-5'-oligoadenylate synthase 1B
GO:0009615	response to virus	Oas2	Oas2	2'-5'-oligoadenylate synthase 2	3.34873e-17	4.9416e-14	4.67719	Oas2	583.301	18.8401	30.9606	4.95236	2.32755e-76	1.2846e-73	up	481	657	589	558	31	18	9	20	Oas2	mmu:246728	2'-5'-oligoadenylate synthase 2
GO:0009615	response to virus	Oas3	Oas3	2'-5'-oligoadenylate synthase 3	3.34873e-17	4.9416e-14	4.67719	Oas3	149.594	3.39333	44.0846	5.4622	2.9524e-13	5.34767e-12	up	95	243	135	118	3	2	4	5	Oas3	mmu:246727	2'-5'-oligoadenylate synthase 3
GO:0009615	response to virus	Oasl1	Oasl1	2'-5'-oligoadenylate synthase-like protein 1	3.34873e-17	4.9416e-14	4.67719	Oasl1	645.07	19.5917	32.9257	5.04114	1.27976e-20	4.84166e-19	up	563	730	911	369	16	16	29	20	Oasl1	mmu:231655	2'-5'-oligoadenylate synthase-like protein 1
GO:0009615	response to virus	Oasl2	Oasl2	2'-5'-oligoadenylate synthase-like protein 2	3.34873e-17	4.9416e-14	4.67719	Oasl2	2817.98	126.316	22.3089	4.47955	1.24404e-58	3.89074e-56	up	2540	3483	3090	2055	159	79	174	110	Oasl2	mmu:23962	2'-5'-oligoadenylate synthase-like protein 2
GO:0009615	response to virus	Rsad2	Rsad2	Radical S-adenosyl methionine domain-containing protein 2	3.34873e-17	4.9416e-14	4.67719	Rsad2	1073.08	18.0921	59.312	5.89025	7.95385e-16	1.97687e-14	up	1029	1077	1680	513	13	21	30	11	Rsad2	mmu:58185	Radical S-adenosyl methionine domain-containing protein 2
GO:0009615	response to virus	Tgtp1	Tgtp1	Tgtp protein	3.34873e-17	4.9416e-14	4.67719	Tgtp1	86.5656	0.721556	119.971	6.90654	1.16593e-11	1.72681e-10	up	64	133	115	36	1	1	1	0	Tgtp1	mmu:21822	Tgtp protein
GO:0009615	response to virus	Tgtp2	Tgtp2	Putative uncharacterized protein	3.34873e-17	4.9416e-14	4.67719	Tgtp2	187.382	2.89452	64.7369	6.01652	2.70218e-47	4.87562e-45	up	165	243	200	135	3	4	1	4	Tgtp2	mmu:100039796	Putative uncharacterized protein
GO:0009615	response to virus	Tlr13	Tlr13	Toll-like receptor 13	3.34873e-17	4.9416e-14	4.67719	Tlr13	2.73806	30.1519	0.0908086	-3.46103	1.95568e-08	1.83675e-07	down	0	1	3	6	47	32	27	19	Tlr13	mmu:279572	Toll-like receptor 13
GO:0009615	response to virus	Tlr3	Tlr3	Putative uncharacterized protein	3.34873e-17	4.9416e-14	4.67719	Tlr3	268.187	67.7197	3.96024	1.98559	2.828e-21	1.1315e-19	up	262	327	289	187	84	89	55	53	Tlr3	mmu:142980	Putative uncharacterized protein
GO:0009615	response to virus	Zc3hav1	Zc3hav1	Zinc finger CCCH-type antiviral protein 1	3.34873e-17	4.9416e-14	4.67719	Zc3hav1	1948.68	722.385	2.69757	1.43166	5.60185e-26	3.07364e-24	up	1846	2296	2084	1486	791	759	794	648	Zc3hav1	mmu:78781	Zinc finger CCCH-type antiviral protein 1
GO:0046813	receptor-mediated virion attachment to host cell	Ace2	Ace2	Angiotensin I converting enzyme 2	0.025079	0.164725	7.05681	Ace2																Ace2	mmu:70008	Angiotensin I converting enzyme 2
GO:0046813	receptor-mediated virion attachment to host cell	Icam1	Icam1	Intercellular adhesion molecule 1	0.025079	0.164725	7.05681	Icam1	114.889	36.4936	3.1482	1.65453	4.10514e-12	6.45708e-11	up	122	107	95	124	50	32	32	37	Icam1	mmu:15894	Intercellular adhesion molecule 1
GO:0003081	regulation of systemic arterial blood pressure by renin-angiotensin	Ace2	Ace2	Angiotensin I converting enzyme 2	0.0470281	0.236852	5.29261	Ace2																Ace2	mmu:70008	Angiotensin I converting enzyme 2
GO:0003081	regulation of systemic arterial blood pressure by renin-angiotensin	Enpep	Enpep	Glutamyl aminopeptidase	0.0470281	0.236852	5.29261	Enpep	12.4609	36.0054	0.346084	-1.53081	8.96976e-06	5.2847e-05	down	12	12	14	11	49	31	37	32	Enpep	mmu:13809	Glutamyl aminopeptidase
GO:0006508	proteolysis	9330101J02Rik	Cfap46	Protein Cfap46	0.070804	0.2632	1.18916	9330101J02Rik	6.16116	14.4749	0.425645	-1.23228	0.0159978	0.0417368	down	7	7	3	7	15	17	16	12	Cfap46	mmu:212124	Protein Cfap46
GO:0006508	proteolysis	Ace2	Ace2	Angiotensin I converting enzyme 2	0.070804	0.2632	1.18916	Ace2																Ace2	mmu:70008	Angiotensin I converting enzyme 2
GO:0006508	proteolysis	Adam23	Adam23	Disintegrin and metalloproteinase domain-containing protein 23	0.070804	0.2632	1.18916	Adam23	2555.8	1177.55	2.17044	1.11799	1.86486e-11	2.69185e-10	up	2727	2943	1966	2405	1261	1225	1225	1165	Adam23	mmu:23792	Disintegrin and metalloproteinase domain-containing protein 23
GO:0006508	proteolysis	Adam8	Adam8	Disintegrin and metalloproteinase domain-containing protein 8	0.070804	0.2632	1.18916	Adam8	62.5337	347.736	0.179831	-2.47529	7.68595e-55	1.94901e-52	down	37	75	56	74	378	331	361	369	Adam8	mmu:11501	Disintegrin and metalloproteinase domain-containing protein 8
GO:0006508	proteolysis	Adamdec1	Adamdec1	Putative uncharacterized protein	0.070804	0.2632	1.18916	Adamdec1	6.56856	0	Inf	20	4.8659e-05	0.000247516	up	5	5	5	10	0	0	0	0	Adamdec1	mmu:58860	Putative uncharacterized protein
GO:0006508	proteolysis	Adamts14	Adamts14	A disintegrin-like and metallopeptidase (Reprolysin type) with thrombospondin type 1 motif, 14	0.070804	0.2632	1.18916	Adamts14	367.216	135.082	2.71846	1.44279	2.65738e-07	2.07169e-06	up	327	514	339	275	148	100	125	185	Adamts14	mmu:237360	A disintegrin-like and metallopeptidase (Reprolysin type) with thrombospondin type 1 motif, 14
GO:0006508	proteolysis	Adamts16	Adamts16	A disintegrin and metalloproteinase with thrombospondin motifs 16	0.070804	0.2632	1.18916	Adamts16	19.101	43.5095	0.439007	-1.18768	0.000880149	0.00334738	down	26	15	22	13	48	44	27	61	Adamts16	mmu:271127	A disintegrin and metalloproteinase with thrombospondin motifs 16
GO:0006508	proteolysis	Adamts17	Adamts17	MCG141698, isoform CRA_c	0.070804	0.2632	1.18916	Adamts17	7.91169	159.85	0.0494945	-4.33659	8.08148e-62	2.91633e-59	down	13	7	9	3	182	170	148	162	Adamts17	mmu:233332	MCG141698, isoform CRA_c
GO:0006508	proteolysis	Adamts3	Adamts3	Adamts3 protein	0.070804	0.2632	1.18916	Adamts3	46.5786	23.1731	2.01003	1.00722	0.000481611	0.00195912	up	43	43	49	47	15	29	24	28	Adamts3	mmu:330119	Adamts3 protein
GO:0006508	proteolysis	Adamts4	Adamts4	A disintegrin and metalloproteinase with thrombospondin motifs 4	0.070804	0.2632	1.18916	Adamts4	402.402	190.704	2.11008	1.0773	9.04763e-10	1.03398e-08	up	404	519	357	313	203	180	188	218	Adamts4	mmu:240913	A disintegrin and metalloproteinase with thrombospondin motifs 4
GO:0006508	proteolysis	Adamts7	Adamts7	Adamts7 protein	0.070804	0.2632	1.18916	Adamts7	425.348	159.373	2.66889	1.41624	3.80254e-07	2.88069e-06	up	381	514	308	456	174	171	149	166	Adamts7	mmu:108153	Adamts7 protein
GO:0006508	proteolysis	Aebp1	Aebp1	Adipocyte enhancer-binding protein 1	0.070804	0.2632	1.18916	Aebp1	14413.2	3733.57	3.86042	1.94876	6.87632e-49	1.35825e-46	up	13812	15533	13174	13962	4087	3866	3443	4061	Aebp1	mmu:11568	Adipocyte enhancer-binding protein 1
GO:0006508	proteolysis	Amz1	Amz1	Archaelysin family metallopeptidase 1	0.070804	0.2632	1.18916	Amz1	81.4805	18.8711	4.31774	2.11028	5.14083e-14	1.02407e-12	up	65	106	81	69	23	16	12	27	Amz1	mmu:231842	Archaelysin family metallopeptidase 1
GO:0006508	proteolysis	Arxes1	Arxes1	Signal peptidase complex subunit 3	0.070804	0.2632	1.18916	Arxes1	359.195	807.104	0.445042	-1.16799	1.07276e-11	1.59638e-10	down	369	274	459	311	915	705	787	931	Arxes1	mmu:76219	Signal peptidase complex subunit 3
GO:0006508	proteolysis	Bace2	Bace2	Beta-secretase 2	0.070804	0.2632	1.18916	Bace2	59.4695	25.85	2.30056	1.20198	4.12217e-06	2.59485e-05	up	69	64	53	49	23	26	32	26	Bace2	mmu:56175	Beta-secretase 2
GO:0006508	proteolysis	C1ra	C1ra	Putative uncharacterized protein	0.070804	0.2632	1.18916	C1ra	2262.39	650.167	3.47971	1.79897	5.16309e-19	1.73941e-17	up	2205	2289	1930	2402	607	712	631	742	C1ra	mmu:50909	Putative uncharacterized protein
GO:0006508	proteolysis	C1rb	C1rb	Complement C1r-B subcomponent	0.070804	0.2632	1.18916	C1rb	716.201	208.487	3.43523	1.78041	2.36732e-11	3.36536e-10	up	589	635	806	759	292	178	238	155	C1rb	mmu:667277	Complement C1r-B subcomponent
GO:0006508	proteolysis	C2	C2	Complement C2	0.070804	0.2632	1.18916	C2	951.078	133.849	7.10558	2.82895	6.52361e-10	7.6129e-09	up	817	783	850	1216	132	134	145	143	C2	mmu:12263	Complement C2
GO:0006508	proteolysis	Capn11	Capn11	Calpain-11	0.070804	0.2632	1.18916	Capn11	1.55288	6.50029	0.238894	-2.06556	0.0195142	0.0494177	down	2	1	1	2	8	10	3	6	Capn11	mmu:268958	Calpain-11
GO:0006508	proteolysis	Capn6	Capn6	Calpain-6	0.070804	0.2632	1.18916	Capn6	171.564	812.272	0.211215	-2.24321	1.43114e-38	1.79035e-36	down	195	201	153	131	1006	802	767	788	Capn6	mmu:12338	Calpain-6
GO:0006508	proteolysis	Casp4	Casp4	Caspase-11 short form splicing variant	0.070804	0.2632	1.18916	Casp4	226.678	59.2162	3.82798	1.93658	1.63617e-29	1.19466e-27	up	212	238	238	203	47	62	57	79	Casp4	mmu:12363	Caspase-11 short form splicing variant
GO:0006508	proteolysis	Cd46	Cd46	Membrane cofactor protein	0.070804	0.2632	1.18916	Cd46	8.0282	18.6335	0.430849	-1.21475	0.00648056	0.0191388	down	8	5	8	10	17	14	25	21	Cd46	mmu:17221	Membrane cofactor protein
GO:0006508	proteolysis	Cfb	Cfb	Complement factor B	0.070804	0.2632	1.18916	Cfb	3705.74	282.62	13.1121	3.71283	7.26328e-53	1.62257e-50	up	3430	3335	3828	3863	332	244	290	303	Cfb	mmu:14962	Complement factor B
GO:0006508	proteolysis	Cfi	Cfi	Complement factor I	0.070804	0.2632	1.18916	Cfi	13.9586	3.14825	4.43377	2.14853	0.000258011	0.0011166	up	23	14	11	8	6	2	0	5	Cfi	mmu:12630	Complement factor I
GO:0006508	proteolysis	Cpa6	Cpa6	Carboxypeptidase A6	0.070804	0.2632	1.18916	Cpa6	32.5852	11.8741	2.74422	1.4564	3.83968e-05	0.0001997	up	42	32	29	26	10	8	12	19	Cpa6	mmu:329093	Carboxypeptidase A6
GO:0006508	proteolysis	Cpb1	Cpb1	Carboxypeptidase B1 (Tissue)	0.070804	0.2632	1.18916	Cpb1	6.21555	16.7134	0.371891	-1.42705	0.0145975	0.0385209	down	7	10	5	3	16	13	11	29	Cpb1	mmu:76703	Carboxypeptidase B1 (Tissue)
GO:0006508	proteolysis	Cpxm1	Cpxm1	Putative uncharacterized protein	0.070804	0.2632	1.18916	Cpxm1	820.338	355.795	2.30565	1.20517	1.79461e-16	4.77673e-15	up	797	905	703	808	374	332	369	397	Cpxm1	mmu:56264	Putative uncharacterized protein
GO:0006508	proteolysis	Cpxm2	Cpxm2	Inactive carboxypeptidase-like protein X2	0.070804	0.2632	1.18916	Cpxm2	39.6307	89.2296	0.444143	-1.1709	9.40509e-08	7.95701e-07	down	48	34	32	41	91	76	105	97	Cpxm2	mmu:55987	Inactive carboxypeptidase-like protein X2
GO:0006508	proteolysis	Ctsh	Ctsh	Pro-cathepsin H	0.070804	0.2632	1.18916	Ctsh	953.098	373.574	2.5513	1.35123	6.00899e-12	9.2653e-11	up	925	1050	761	988	410	354	399	383	Ctsh	mmu:13036	Pro-cathepsin H
GO:0006508	proteolysis	Ctss	Ctss	Cathepsin S	0.070804	0.2632	1.18916	Ctss	20.5616	151.957	0.135313	-2.88563	2.35851e-39	3.16125e-37	down	10	14	29	26	167	151	152	159	Ctss	mmu:13040	Cathepsin S
GO:0006508	proteolysis	Dld	Dld	Dihydrolipoyl dehydrogenase, mitochondrial	0.070804	0.2632	1.18916	Dld	1232.91	2858.54	0.431309	-1.2132	5.43367e-27	3.22667e-25	down	1459	964	1589	879	3055	2955	2977	2849	Dld	mmu:13382	Dihydrolipoyl dehydrogenase, mitochondrial
GO:0006508	proteolysis	Dpep2	Dpep2	Dipeptidase 2	0.070804	0.2632	1.18916	Dpep2	9.87498	45.2367	0.218296	-2.19564	3.4041e-10	4.14522e-09	down	7	11	7	13	57	32	55	43	Dpep2	mmu:319446	Dipeptidase 2
GO:0006508	proteolysis	Dpp4	Dpp4	Dipeptidyl peptidase 4	0.070804	0.2632	1.18916	Dpp4	12.4452	4.36026	2.85423	1.5131	0.00902194	0.0253856	up	10	19	9	11	3	3	6	6	Dpp4	mmu:13482	Dipeptidyl peptidase 4
GO:0006508	proteolysis	Ece1	Ece1	Endothelin-converting enzyme 1	0.070804	0.2632	1.18916	Ece1	2050.07	962.193	2.13062	1.09128	4.79309e-24	2.29445e-22	up	2055	2220	1914	1869	989	1093	914	990	Ece1	mmu:230857	Endothelin-converting enzyme 1
GO:0006508	proteolysis	Ecel1	Ecel1	Putative uncharacterized protein	0.070804	0.2632	1.18916	Ecel1	13.1198	1.94755	6.73658	2.75202	0.00317563	0.0103116	up	10	4	17	19	2	0	2	4	Ecel1	mmu:13599	Putative uncharacterized protein
GO:0006508	proteolysis	Enpep	Enpep	Glutamyl aminopeptidase	0.070804	0.2632	1.18916	Enpep	12.4609	36.0054	0.346084	-1.53081	8.96976e-06	5.2847e-05	down	12	12	14	11	49	31	37	32	Enpep	mmu:13809	Glutamyl aminopeptidase
GO:0006508	proteolysis	Espl1	Espl1	Espl1 protein	0.070804	0.2632	1.18916	Espl1	107.53	41.7694	2.57437	1.36422	6.48195e-11	8.65721e-10	up	92	134	115	84	55	44	32	42	Espl1	mmu:105988	Espl1 protein
GO:0006508	proteolysis	Fap	Fap	Prolyl endopeptidase FAP	0.070804	0.2632	1.18916	Fap	22.0863	52.5256	0.420486	-1.24987	0.000420152	0.00173088	down	25	28	27	9	60	40	44	73	Fap	mmu:14089	Prolyl endopeptidase FAP
GO:0006508	proteolysis	Folh1	Folh1	Glutamate carboxypeptidase 2	0.070804	0.2632	1.18916	Folh1	4.32431	11.6193	0.372166	-1.42598	0.0170244	0.0440442	down	4	6	3	4	6	10	15	17	Folh1	mmu:53320	Glutamate carboxypeptidase 2
GO:0006508	proteolysis	Gzme	Gzme	Granzyme E	0.070804	0.2632	1.18916	Gzme	7.03451	1.20495	5.83799	2.54547	0.00490189	0.0149738	up	8	11	4	5	1	2	0	2	Gzme	mmu:14942	Granzyme E
GO:0006508	proteolysis	Hp	Hp	Haptoglobin	0.070804	0.2632	1.18916	Hp	162543	58733.9	2.76745	1.46856	6.61474e-22	2.79562e-20	up	165222	140616	172455	158204	64225	50555	55699	72370	Hp	mmu:15439	Haptoglobin
GO:0006508	proteolysis	Immp2l	Immp2l	Mitochondrial inner membrane protease subunit 2	0.070804	0.2632	1.18916	Immp2l	33.6658	78.9032	0.426672	-1.2288	1.25002e-07	1.0402e-06	down	38	24	38	32	86	89	88	64	Immp2l	mmu:93757	Mitochondrial inner membrane protease subunit 2
GO:0006508	proteolysis	Klk8	Klk8	Kallikrein-8	0.070804	0.2632	1.18916	Klk8	59.2108	14.7373	4.01774	2.00639	7.67359e-12	1.16312e-10	up	57	68	49	58	19	14	13	15	Klk8	mmu:259277	Kallikrein-8
GO:0006508	proteolysis	Masp1	Masp1	Mannan-binding lectin serine protease 1	0.070804	0.2632	1.18916	Masp1	236.338	83.0582	2.84545	1.50866	8.27912e-06	4.90552e-05	up	199	347	185	201	105	82	91	66	Masp1	mmu:17174	Mannan-binding lectin serine protease 1
GO:0006508	proteolysis	Mcpt8	Mcpt8	Mast cell protease 8	0.070804	0.2632	1.18916	Mcpt8	4.94624	0.484614	10.2065	3.35142	0.00814262	0.0232815	up	6	4	2	7	1	0	1	0	Mcpt8	mmu:17231	Mast cell protease 8
GO:0006508	proteolysis	Mmp10	Mmp10	Matrix metallopeptidase 10	0.070804	0.2632	1.18916	Mmp10	5.71525	0.242704	23.5482	4.55754	0.0110356	0.0302123	up	6	13	1	3	0	0	1	0	Mmp10	mmu:17384	Matrix metallopeptidase 10
GO:0006508	proteolysis	Mmp3	Mmp3	Stromelysin-1	0.070804	0.2632	1.18916	Mmp3	91.6542	0.478851	191.404	7.58048	9.71493e-13	1.65427e-11	up	56	154	66	84	1	1	0	0	Mmp3	mmu:17392	Stromelysin-1
GO:0006508	proteolysis	Mst1	Mst1	Hepatocyte growth factor-like protein	0.070804	0.2632	1.18916	Mst1	7.41182	25.1277	0.294966	-1.76138	2.94069e-05	0.000155925	down	7	4	11	7	23	25	30	26	Mst1	mmu:15235	Hepatocyte growth factor-like protein
GO:0006508	proteolysis	Pamr1	Pamr1	Inactive serine protease PAMR1	0.070804	0.2632	1.18916	Pamr1	679.992	223.508	3.04237	1.6052	3.75114e-37	4.34507e-35	up	669	744	695	573	250	209	248	218	Pamr1	mmu:210622	Inactive serine protease PAMR1
GO:0006508	proteolysis	Pcsk1	Pcsk1	Neuroendocrine convertase 1	0.070804	0.2632	1.18916	Pcsk1	4.96041	0.244581	20.2813	4.34208	0.00220056	0.00748614	up	6	6	6	2	0	0	0	1	Pcsk1	mmu:18548	Neuroendocrine convertase 1
GO:0006508	proteolysis	Pcsk6	Pcsk6	Protein Pcsk6	0.070804	0.2632	1.18916	Pcsk6	551.922	1236.97	0.446188	-1.16428	4.8368e-25	2.49348e-23	down	642	505	536	490	1244	1463	1199	1220	Pcsk6	mmu:18553	Protein Pcsk6
GO:0006508	proteolysis	Pcsk9	Pcsk9	Proprotein convertase subtilisin/kexin type 9	0.070804	0.2632	1.18916	Pcsk9	237.176	36.0516	6.57878	2.71782	7.55193e-23	3.3344e-21	up	194	282	283	179	46	26	37	40	Pcsk9	mmu:100102	Proprotein convertase subtilisin/kexin type 9
GO:0006508	proteolysis	Plat	Plat	Tissue-type plasminogen activator	0.070804	0.2632	1.18916	Plat	1866.18	674.929	2.765	1.46728	2.37392e-12	3.86354e-11	up	1652	2373	1605	1704	782	598	684	728	Plat	mmu:18791	Tissue-type plasminogen activator
GO:0006508	proteolysis	Prss27	Prss27	Serine protease 27	0.070804	0.2632	1.18916	Prss27	5.67643	14.7075	0.385955	-1.37349	0.00903214	0.0254067	down	2	4	10	6	8	22	12	19	Prss27	mmu:213171	Serine protease 27
GO:0006508	proteolysis	Prss46	Prss46	Serine protease 46	0.070804	0.2632	1.18916	Prss46	12.3487	0.487285	25.3418	4.66345	1.88798e-06	1.26112e-05	up	8	19	7	14	0	0	1	1	Prss46	mmu:74306	Serine protease 46
GO:0006508	proteolysis	Prtn3	Prtn3	Proteinase 3	0.070804	0.2632	1.18916	Prtn3	48.4201	20.0795	2.41142	1.26988	0.000153645	0.000701324	up	39	36	66	48	20	16	24	23	Prtn3	mmu:19152	Proteinase 3
GO:0006508	proteolysis	Psmb8	Psmb8	Proteasome subunit beta type-8	0.070804	0.2632	1.18916	Psmb8	1380.12	167.858	8.22192	3.03948	2.15229e-57	6.11934e-55	up	1258	1376	1361	1398	140	143	221	190	Psmb8	mmu:16913	Proteasome subunit beta type-8
GO:0006508	proteolysis	Psmb9	Psmb9	Proteasome subunit beta type-9	0.070804	0.2632	1.18916	Psmb9	904.131	164.855	5.48438	2.45533	1.37424e-30	1.07898e-28	up	860	814	1128	759	152	156	187	187	Psmb9	mmu:16912	Proteasome subunit beta type-9
GO:0006508	proteolysis	Qpct	Qpct	Glutaminyl-peptide cyclotransferase (Glutaminyl cyclase)	0.070804	0.2632	1.18916	Qpct	68.0291	136.455	0.498545	-1.0042	4.18114e-08	3.72373e-07	down	95	53	52	67	153	137	148	127	Qpct	mmu:70536	Glutaminyl-peptide cyclotransferase (Glutaminyl cyclase)
GO:0006508	proteolysis	Rhbdl1	Rhbdl1	Putative uncharacterized protein	0.070804	0.2632	1.18916	Rhbdl1	129.023	274.097	0.470719	-1.08706	4.51174e-13	8.03253e-12	down	134	114	175	89	275	291	290	279	Rhbdl1	mmu:214951	Putative uncharacterized protein
GO:0006508	proteolysis	Slpi	Slpi	Antileukoproteinase	0.070804	0.2632	1.18916	Slpi	7.25255	0.489161	14.8265	3.89011	0.000284734	0.00121987	up	5	13	7	4	0	0	0	2	Slpi	mmu:20568	Antileukoproteinase
GO:0006508	proteolysis	Tfr2	Tfr2	Transferrin receptor protein 2	0.070804	0.2632	1.18916	Tfr2	297.482	630.775	0.471613	-1.08432	9.52429e-14	1.82557e-12	down	278	265	428	208	656	695	668	594	Tfr2	mmu:50765	Transferrin receptor protein 2
GO:0006508	proteolysis	Tfrc	Tfrc	Transferrin receptor protein 1	0.070804	0.2632	1.18916	Tfrc	369.866	1162.09	0.318278	-1.65164	4.91854e-34	4.8577e-32	down	435	317	454	262	1114	1405	1123	1174	Tfrc	mmu:22042	Transferrin receptor protein 1
GO:0006508	proteolysis	Tinagl1	Tinagl1	Tubulointerstitial nephritis antigen-like	0.070804	0.2632	1.18916	Tinagl1	225.584	93.5985	2.41012	1.26911	1.9957e-15	4.74043e-14	up	220	247	230	192	92	83	93	119	Tinagl1	mmu:94242	Tubulointerstitial nephritis antigen-like
GO:0006508	proteolysis	Tll1	Tll1	Metalloendopeptidase	0.070804	0.2632	1.18916	Tll1	171.212	56.9743	3.00507	1.5874	2.30788e-08	2.14393e-07	up	149	232	142	151	85	56	49	46	Tll1	mmu:21892	Metalloendopeptidase
GO:0006508	proteolysis	Tnfaip3	Tnfaip3	Tumor necrosis factor alpha-induced protein 3	0.070804	0.2632	1.18916	Tnfaip3	418.902	118.105	3.54687	1.82654	3.02293e-15	7.03787e-14	up	388	491	332	427	123	123	121	122	Tnfaip3	mmu:21929	Tumor necrosis factor alpha-induced protein 3
GO:0006508	proteolysis	Uchl1	Uchl1	Ubiquitin carboxyl-terminal hydrolase isozyme L1	0.070804	0.2632	1.18916	Uchl1	112.534	30.7042	3.6651	1.87385	1.51167e-15	3.6414e-14	up	110	143	96	95	44	27	18	38	Uchl1	mmu:22223	Ubiquitin carboxyl-terminal hydrolase isozyme L1
GO:0006508	proteolysis	Uchl5	Uchl5	Ubiquitin carboxyl-terminal hydrolase isozyme L5	0.070804	0.2632	1.18916	Uchl5	74.6142	180.571	0.413212	-1.27505	2.4444e-13	4.48379e-12	down	89	80	78	50	203	194	187	164	Uchl5	mmu:56207	Ubiquitin carboxyl-terminal hydrolase isozyme L5
GO:0006508	proteolysis	Uqcrc2	Uqcrc2	Cytochrome b-c1 complex subunit 2, mitochondrial	0.070804	0.2632	1.18916	Uqcrc2	3107.07	6511.69	0.477153	-1.06748	1.50694e-25	8.10249e-24	down	3586	2300	3734	2626	6679	6801	6877	6605	Uqcrc2	mmu:67003	Cytochrome b-c1 complex subunit 2, mitochondrial
GO:0006508	proteolysis	Usp13	Usp13	Ubiquitin carboxyl-terminal hydrolase 13	0.070804	0.2632	1.18916	Usp13	209.026	94.8818	2.20302	1.13948	1.67285e-12	2.76817e-11	up	239	205	206	175	106	100	102	85	Usp13	mmu:72607	Ubiquitin carboxyl-terminal hydrolase 13
GO:0006508	proteolysis	Usp18	Usp18	Ubiquitin carboxyl-terminal hydrolase	0.070804	0.2632	1.18916	Usp18	1788.52	68.7169	26.0274	4.70196	1.57134e-46	2.8082e-44	up	1826	2269	1884	1146	88	46	84	66	Usp18	mmu:24110	Ubiquitin carboxyl-terminal hydrolase
GO:0032800	receptor biosynthetic process	Ace2	Ace2	Angiotensin I converting enzyme 2	0.257493	0.404228	3.52841	Ace2																Ace2	mmu:70008	Angiotensin I converting enzyme 2
GO:0003051	angiotensin-mediated drinking behavior	Ace2	Ace2	Angiotensin I converting enzyme 2	0.257493	0.404228	3.52841	Ace2																Ace2	mmu:70008	Angiotensin I converting enzyme 2
