# Supplementary material for: ACE2 pathway regulates thermogenesis and energy metabolism
Source: eLife. 2022 Jan 11;11:e72266. doi: 10.7554/eLife.72266 (PMC8776250; doi:10.7554/eLife.72266)
Supplement: Figure 7—figure supplement 2—source data 1. [file elife-72266-fig7-figsupp2-data1.xlsx]

## Sheet: Sheet1
Figure 7-figure supplement 2
A- immunoblot														B- mRNA
	Control			GFP			ACE2			ACE2+MK2206					GFP				ACE2				ACE2+MK2206
pAkt308/Akt	0.964607	0.963623	1.00357	0.804652	0.987921	0.922341	2.2425	1.95808	2.26386	0.135425	0.136581	0.123859		UCP1	1.79599	1.9249	2.19585		348.444	336.575	32.1062		92.0778	91.4418	94.6665
UCP1	0.929902	0.90785	1.12306	1.23542	1.36581	1.23859	1.5442	1.66581	1.73859	0.785435	0.653585	0.712944		PGC-1α	1.23544	0.699805	1.01047		24.168	27.1904	6.3865		8.846	9.2858	7.80839
pFOXO1/FOXO1	1.00593	0.881305	0.942596	1.22785	1.22053	1.34813	1.32735	1.425	1.438	0.24347	0.2535	0.348138		Cidea	1.32686	1.33608	1.30859		27.0585	27.2467	3.35895		10.5415	10.3964	10.2533
														ATP sym	1.75759	1.83223	1.76981		33.909	36.0918	5.18232		13.9636	13.8671	13.8671
														AP2	1.43568	1.35824	1.3772		38.3655	38.9011	2.71648		8.34978	8.34978	7.89937
														CPT-1α	0.848862	0.854767	0.831393		51.3967	50.6891	54.7051		2.36789	0.59609	0.703978
C- OCR																		C- Maximal Respiration
Time (minutes)	Control				Control+MK2206				ACE2				ACE2+MK2206					Control	Control+MK2206	ACE2	ACE2+MK2206
1.43884	180.823	184.74	166.357		122.366	124.156	109.465		220.73	240.732	221.474		165.368	155.977	142.574			387.87	239.826	485.442	317.027
10.2768	181.45	187.828	166.934		122.51	125.133	112.304		220.833	240.521	221.28		164.826	155.025	149.916			378.676	216.428	422.511	273.582
19.1082	194.053	191.604	178.529		123.09	127.253	111.187		227.121	246.248	226.548		166.706	158.658	149.81			377.418	204.869	447.111	297.377
28.0052	77.8926	97.3443	71.6612		76.6235	78.4347	73.4442		106.315	119.427	109.873		92.8197	85.3341	84.1445			395.406	257.549	464.388	346.572
36.7836	81.2202	105.031	74.7226		73.6993	77.8478	73.9163		105.092	117.299	107.915		89.7799	86.3847	84.3904			384.057	234.45	428.573	296.148
45.6155	82.1891	92.0907	75.614		74.815	78.4326	74.9808		108.674	119.797	110.213		91.3245	86.5618	85.368			370.759	237.716	467.951	306.244
54.5595	387.87	395.406	356.84		239.826	257.549	207.861		485.442	464.388	427.237		317.027	346.572	305.147			356.84	207.861	427.237	305.147
63.3444	378.676	384.057	348.382		216.428	234.45	187.753		422.511	428.573	394.288		273.582	296.148	246.489			348.382	187.753	394.288	246.489
72.1079	377.418	370.759	347.224		204.869	237.716	188.458		447.111	467.951	430.515		297.377	306.244	252.33			347.224	188.458	430.515	252.33
80.9678	60.3621	74.9412	55.5331		69.3976	68.6428	62.8094		99.2159	98.1816	90.3271		90.3591	77.7737	70.8549
89.7622	66.0262	80.9431	60.7441		67.8617	68.6286	62.9643		104.35	114.388	105.237		93.1284	85.5005	76.6849
98.6046	64.0816	74.8909	58.955		63.2541	61.6226	57.026		100.38	107.111	98.5425		91.8739	81.0128	72.2
D- immunoblot
	WT				Mas-/-
p-PKA/PKA	0.964607	0.763623	1.10356		0.384652	0.357921	0.222341
E- immunoblot
	Control				Ang-(1-7)				Ang-(1-7)+H89
p-PKA/PKA	0.898111	1.10347	1.00079		1.52475	1.21497	1.36986		0.694697	0.668666	0.981682
F- OCR																	F- Maximal Respiration
Time (minutes)	Control				Control+H89				ACE2				ACE2+H89				Control	Control+H89	ACE2	ACE2+H89
1.43884	180.823	184.74	169.961		167.867	184.79	190.254		220.73	240.732	221.474		148.41	182.985	164.186		387.87	440.574	485.442	315.287
10.2768	181.45	187.828	172.801		173.512	189.534	192.815		220.833	240.521	221.28		152.609	186.175	169.923		378.676	352.74	422.511	297.4
19.1082	194.053	191.604	176.275		177.731	199.552	201.346		227.121	246.248	226.548		157.331	192.397	173.512		377.418	333.557	447.111	319.104
28.0052	77.8926	97.3443	89.5567		81.7259	89.6577	102.676		106.315	119.427	109.873		84.7993	102.978	85.1301		395.406	308.057	464.388	391.735
36.7836	81.2202	105.031	96.6285		86.3171	94.0746	94.3536		105.092	117.299	107.915		87.6183	102.279	91.0115		384.057	456.462	428.573	373.091
45.6155	82.1891	92.0907	84.7234		85.8318	93.4592	94.8481		108.674	119.797	110.213		87.3461	102.835	91.1143		370.759	443.64	467.951	394.819
54.5595	387.87	395.406	363.774		440.574	508.057	444.748		485.442	464.388	427.237		315.287	391.735	299.57		356.84	444.748	427.237	299.57
63.3444	378.676	384.057	353.332		352.74	456.462	403.534		422.511	428.573	394.288		297.4	373.091	290.035		348.382	403.534	394.288	290.035
72.1079	377.418	370.759	341.099		333.557	443.64	420.068		447.111	467.951	430.515		319.104	394.819	313.405		347.224	420.068	430.515	313.405
80.9678	60.3621	74.9412	68.9459		54.5303	64.95	82.3343		99.2159	98.1816	90.3271		73.3213	87.0403	64.5751
89.7622	66.0262	80.9431	74.4676		64.5352	78.0644	85.8635		104.35	114.388	105.237		85.6349	93.3268	73.2025
98.6046	64.0816	74.8909	68.8997		63.3769	76.6925	77.5699		100.38	107.111	98.5425		81.4451	90.9366	73.6727
G- OCR																					G- Maximal Respiration
Time (minutes)	Control				ACE2				ACE2+H89				ACE2+MK2206				ACE2+H89+MK2206				Control	Ang-(1-7)	Ang-(1-7)+H89	Ang-(1-7)+MK2206	Ang-(1-7)+H89+MK2206
1.43884	180.823	184.74	169.961		220.73	240.732	221.474		148.41	182.985	164.186		122.366	124.156	109.465		94.7832	85.5854	78.7386		387.87	485.442	315.287	239.826	150.994
10.2768	181.45	187.828	172.801		220.833	240.521	221.28		152.609	186.175	169.923		122.51	125.133	112.304		96.1275	85.8579	78.9893		378.676	422.511	297.4	216.428	133.371
19.1082	194.053	191.604	176.275		227.121	246.248	226.548		157.331	192.397	173.512		123.09	127.253	111.187		94.4984	86.8116	79.8667		377.418	447.111	319.104	204.869	131.522
28.0052	77.8926	97.3443	89.5567		106.315	119.427	109.873		84.7993	102.978	85.1301		76.6235	78.4347	73.4442		63.1813	56.1622	51.6692		395.406	464.388	391.735	257.549	127.701
36.7836	81.2202	105.031	96.6285		105.092	117.299	107.915		87.6183	102.279	91.0115		73.6993	77.8478	73.9163		61.3434	53.5001	49.2201		384.057	428.573	373.091	234.45	116.441
45.6155	82.1891	92.0907	84.7234		108.674	119.797	110.213		87.3461	102.835	91.1143		74.815	78.4326	74.9808		59.5601	50.8128	46.7478		370.759	467.951	394.819	237.716	117.085
54.5595	387.87	395.406	363.774		485.442	464.388	427.237		315.287	391.735	299.57		239.826	257.549	207.861		150.994	127.701	117.485		363.774	427.237	299.57	207.861	117.485
63.3444	378.676	384.057	353.332		422.511	428.573	394.288		297.4	373.091	290.035		216.428	234.45	187.753		133.371	116.441	107.126		353.332	394.288	290.035	187.753	107.126
72.1079	377.418	370.759	341.099		447.111	467.951	430.515		319.104	394.819	313.405		204.869	237.716	188.458		131.522	117.085	107.718		341.099	430.515	313.405	188.458	107.718
80.9678	60.3621	74.9412	68.9459		99.2159	98.1816	90.3271		73.3213	87.0403	64.5751		69.3976	68.6428	62.8094		48.0782	43.9421	40.4267
89.7622	66.0262	80.9431	74.4676		104.35	114.388	105.237		85.6349	93.3268	73.2025		67.8617	68.6286	62.9643		49.6495	42.8781	39.4478
98.6046	64.0816	74.8909	68.8997		100.38	107.111	98.5425		81.4451	90.9366	73.6727		63.2541	61.6226	57.026		47.9694	40.0073	36.8067
H- OCR																						H- Maximal Respiration
Time (minutes)	Ang-(1-7)					Ang-(1-7)+H89						Ang-(1-7)+MK2206				Ang-(1-7)+A779						Ang-(1-7)	Ang-(1-7)+H89	Ang-(1-7)+MK2206	Ang-(1-7)+A779
1.43624	268.367	262.062	258.904	214.673		196.821	175.088	193.556	197.554	133.478		175.962	141.307	152.389		182.904	244.957	221.714	250.658	119.433		365.29	279.057	240.423	288.528
10.2188	258.063	258.78	254.706	215.387		198.279	162.32	184.124	189.554	133.576		172.948	133.297	148.598		181.981	247.404	220.005	245.895	119.867		336.674	262.715	222.964	179.254
18.9585	260.56	261.602	252.492	219.847		199.794	165.541	183.817	194.187	135.843		178.233	129.105	146.697		183.722	250.143	220.609	245.417	121.282		342.599	268.279	221.752	162.99
27.8408	98.0015	117.916	109.151	89.8665		90.9709	82.3983	83.3622	85.9891	65.277		85.9493	67.7971	82.5259		78.8437	119.091	109.972	97.2287	45.1471		386.207	317.039	221.625	433.15
36.6161	105.164	112.991	111.145	89.8305		96.3564	89.7018	89.1405	91.4016	64.9294		86.7324	63.6347	84.1861		66.1079	103.098	89.7322	94.0835	46.9312		375.344	288.98	195.982	251.583
45.3967	102.426	111.399	107.833	90.0656		98.0528	83.4353	79.6556	90.0972	64.587		82.497	63.6914	85.6518		61.6756	93.3757	82.6661	103.926	47.4217		375.808	286.813	198.6	216.279
54.2468	365.29	386.207	365.091	431.438		279.057	317.039	374.2	347.831	252.293		240.423	221.625	261.73		288.528	433.15	355.693	414.143	206.041		365.091	374.2	261.73	355.693
63.0294	336.674	375.344	362.112	392.95		262.715	288.98	319.637	322.555	242.736		222.964	195.982	247.494		179.254	251.583	232.908	293.795	181.577		362.112	319.637	247.494	232.908
71.8516	342.599	375.808	358.659	406.803		268.279	286.813	329.127	304.233	253.537		221.752	198.6	249.542		162.99	216.279	209.789	257.962	188.582		358.659	329.127	249.542	209.789
80.7395	65.3378	79.7543	77.0669	58.7484		82.8381	53.3368	51.7853	63.7211	47.1234		78.2281	62.2704	76.0095		27.0675	46.4518	36.5144	47.0921	35.1615		431.438	347.831		414.143
89.5331	73.6941	83.4287	77.987	72.2345		88.1538	61.2912	57.5791	63.5286	57.3724		76.1884	59.3166	84.9337		36.0768	52.4043	49.6886	60.6496	43.7445		392.95	322.555		293.795
98.3616	66.3808	77.2171	70.8298	68.1722		83.4293	56.5493	49.3324	59.1064	54.844		76.0796	56.0034	82.934		34.5972	50.6983	48.6513	61.0868	40.7993		406.803	304.233		257.962
																							252.293		206.041
																							242.736		181.577
																							253.537		188.582
