# Supplementary material for: ACE2 pathway regulates thermogenesis and energy metabolism
Source: eLife. 2022 Jan 11;11:e72266. doi: 10.7554/eLife.72266 (PMC8776250; doi:10.7554/eLife.72266)
Supplement: Figure 7—source data 1. [file elife-72266-fig7-data1.xlsx]

## Sheet: Sheet1
Figure 7
A- pAkt308/Akt immunoblot			B- pAkt308/Akt immunoblot			C- immunoblot
WT	ACE2-/y		db/db+GFP	db/db+ACE2			Control			Ang-(1-7)			Ang-(1-7)+MK2206
1.12252	0.493181		0.964607	3.80465		pAkt308/Akt	0.964607	0.963623	1.00357	3.80465	2.98792	1.92234	0.135425	0.336581	0.423859
0.9942	0.553806		0.963623	3.97921		UCP1	0.929902	0.90785	1.12306	2.23542	1.86581	1.73859	0.785435	0.953585	0.712944
0.883275	0.345249		1.20356	4.22234		pFOXO1/FOXO1	1.00593	0.881305	0.942596	1.82785	1.42054	1.94813	1.44347	1.3535	1.54814
D- mRNA
	Control					Ang-(1-7)							Ang-(1-7)+MK2206
UCP1	1.0877	1.05795	0.940355	0.908323		2.23655	2.43054	0.674214	0.678903	55.7646	50.2579		0.073877	0.075954	0.074391	0.174497	0.139785	0.145721
PGC-1α	0.654289	0.805525	1.27279	1.23799		1.67946	2.09653	10.0422	9.50048	8.32818	12.0253		0.01921	0.020732	0.02398	0.060707	0.04863	0.066431
Cidea	1.14986	1.13403	0.902166	0.830162		2.39739	1.90721	0.578931	4.96387	4.99839	4.96387		0.01161	0.012019	0.015108	0.014393	0.013902
ATP sym	0.937222	1.09921				0.671967	0.676641	5.12113	3.80122				0.018536	0.018925	0.014543	0.061916	0.065447	0.049599
AP2	1.20177	1.19347	0.832293	0.820835		0.24235	0.247442	0.755322	13.7863	12.8631	12.5983		0.085092	0.081062	0.006826	0.005468	0.005544
CPT-1α	0.580156	0.588255	1.43845	1.37032		1.7587	1.79566	0.364632	0.367168	13.4965	13.9725		0.07252	0.076125	0.07252	0.003139	0.003606	0.003183
E- OCR																		E-Maximal Respiration
	Control				Control+MK2206				Ang-(1-7)					Ang-(1-7)+MK2206				Control	Control+MK2206	Ang-(1-7)	Ang-(1-7)+MK2206
1.43624	222.393	289.771	202.619		137.07	130.784	126.917		268.367	262.062	258.904	214.673		175.962	141.307	152.389		352.895	205.754	365.29	240.423
10.1676	213.928	289.643	195.021		132.298	132.571	122.499		258.063	258.78	254.706	215.387		142.948	133.297	148.598		333.803	171.539	336.674	222.964
19.0008	216.773	296.979	200.844		132.598	129.77	122.776		260.56	261.602	252.492	219.847		148.233	129.105	146.697		330.946	169.143	342.599	221.752
27.8965	94.7818	116.415	88.5737		68.5416	57.2951	63.4644		98.0015	117.916	109.151	89.8665		85.9493	67.7971	82.5259		393.84	201.924	386.207	221.625
36.6954	94.805	118.746	90.0613		70.4856	55.3142	65.2644		105.164	112.991	111.145	89.8305		86.7324	63.6347	84.1861		384.794	177.068	375.344	195.982
45.5219	90.8296	115.18	89.0306		68.481	58.8267	63.4084		102.426	111.399	107.833	90.0656		82.497	63.6914	85.6518		369.193	173.477	375.808	198.6
54.4186	352.895	393.84	275.314		205.754	201.924	190.513		365.29	386.207	365.091	431.438		240.423	221.625	261.73		275.314	190.513	365.091	261.73
63.2178	333.803	384.794	265.203		171.539	177.068	158.832		336.674	375.344	362.112	392.95		222.964	195.982	247.494		265.203	158.832	362.112	247.494
72.0552	330.946	369.193	261.899		169.143	173.477	156.614		342.599	375.808	358.659	406.803		221.752	198.6	249.542		261.899	156.614	358.659	249.542
80.9342	64.5047	77.4487	74.0966		37.6042	35.2636	34.8187		65.3378	79.7543	77.0669	58.7484		78.2281	62.2704	76.0095				431.438
89.7402	64.3897	80.5364	70.1		43.3759	39.1078	40.1628		73.6941	83.4287	77.987	72.2345		76.1884	59.3166	84.9337				392.95
98.5768	57.9406	78.6531	69.5628		41.3883	36.4897	38.3225		66.3808	77.2171	70.8298	68.1722		76.0796	56.0034	82.934				406.803
F- pPKA/PKA immunoblot								G- pPKA/PKA immunoblot
	WT			ACE2-/y					db/db+GFP			db/db+ACE2
pPKA/PKA	0.964607	0.963623	1.10356	0.404652	0.117921	0.622341		pPKA/PKA	0.964607	0.963623	1.20356	4.80465	6.97921	8.22234
H- mRNA
	Control					Ang-(1-7)						Ang-(1-7)+H89						Ang-(1-7)+SQ-22536
UCP1	0.947596	0.878031	0.915317	1.25906		2.58891	1.73473	2.66169	1.97567	1.51423		1.22463	0.79683	1.28551	1.36583	1.16196		0.38752	0.660826	0.629528	1.07352	0.708256
Cidea	1.10562	1.1367	0.942689	0.81499		1.9117	1.22971	1.92329	1.97593	2.54005		1.11331	0.671218	0.87956	1.38978	0.873485		0.861459	1.07539	0.855509	1.52083	1.17946
ATPsyn	0.848365	0.909255	1.2335	1.00888		2.04593	1.37817	1.18325	1.74443	1.61637		1.24208	1.19148	0.733443	0.860207	1.1509		0.854266	0.47723	0.679599	0.808184	0.65645
AP2	1.20424	1.22954	0.706187	0.721026		1.56713	1.57803	1.26468	1.85745	1.24208		1.29067	1.4929	0.489073	0.459495	0.881555		1.37375	1.21262	1.80016	1.75093	1.40262
I- immunoblot
	Control				Ang-(1-7)				Ang-(1-7)+H89				Ang-(1-7)+SQ-22536
UCP1	0.848111	1.16742	1.00777		1.81817	2.85996	2.45208		1.06226	0.3311	0.696682		1.60607	0.674043	1.39006
PGC-1α	1.10271	0.898001	1.00036		1.39631	1.99672	1.44651		0.61591	0.370906	0.493408		0.930288	0.30558	0.617934
J- OCR																					J-Maximal Respiration
	Control				Control+H89					Ang-(1-7)					Ang-(1-7)+H89						Control	Control+H89	Ang-(1-7)	Ang-(1-7)+H89
1.43624	222.393	289.771	202.619		195.525	108.193	163.174	211.816		268.367	262.062	258.904	214.673		175.088	193.556	197.554	133.478	97.7363		352.895	429.567	365.29	252.293
10.1676	213.928	289.643	195.021		191.546	109.619	159.302	207.548		258.063	258.78	254.706	215.387		162.32	184.124	189.554	133.576	94.0369		333.803	405.155	336.674	242.736
19.0008	216.773	296.979	200.844		194.58	113.87	162.994	208.987		260.56	261.602	252.492	219.847		165.541	183.817	194.187	135.843	96.6498		330.946	411.118	342.599	253.537
27.8965	94.7818	116.415	88.5737		92.6836	56.4245	83.0612	105.288		98.0015	117.916	109.151	89.8665		82.3983	83.3622	85.9891	65.277	46.8191		393.84	214.953	386.207	317.039
36.6954	94.805	118.746	90.0613		91.8426	62.7052	82.1327	107.001		105.164	112.991	111.145	89.8305		89.7018	89.1405	91.4016	64.9294	49.1475		384.794	189.765	375.344	288.98
45.5219	90.8296	115.18	89.0306		90.8534	64.8384	82.1767	105.732		102.426	111.399	107.833	90.0656		83.4353	79.6556	90.0972	64.587	48.3985		369.193	186.907	375.808	286.813
54.4186	352.895	393.84	275.314		429.567	214.953	321.702	442.856		365.29	386.207	365.091	431.438		317.039	374.2	347.831	252.293	180.646		275.314	321.702	365.091	374.2
63.2178	333.803	384.794	265.203		405.155	189.765	277.749	420.67		336.674	375.344	362.112	392.95		288.98	319.637	322.555	242.736	183.156		265.203	277.749	362.112	319.637
72.0552	330.946	369.193	261.899		411.118	186.907	267.917	405.374		342.599	375.808	358.659	406.803		286.813	329.127	304.233	253.537	192.31		261.899	267.917	358.659	329.127
80.9342	64.5047	77.4487	74.0966		71.8327	54.8623	70.3553	80.1174		65.3378	79.7543	77.0669	58.7484		53.3368	51.7853	63.7211	47.1234	35.3749			442.856	431.438	347.831
89.7402	64.3897	80.5364	70.1		72.6828	52.7892	69.507	83.8534		73.6941	83.4287	77.987	72.2345		61.2912	57.5791	63.5286	57.3724	43.6486			420.67	392.95	322.555
98.5768	57.9406	78.6531	69.5628		67.9825	47.0947	65.222	76.1146		66.3808	77.2171	70.8298	68.1722		56.5493	49.3324	59.1064	54.844	39.3535			405.374	406.803	304.233
																								180.646
																								183.156
																								192.31
