# Supplementary material for: ACE2 pathway regulates thermogenesis and energy metabolism
Source: eLife journal article supplement (doi:10.7554/elife.72266), 2022-01-10
Supplement: supp [file elife_poa_e72266_Figure_4_source_data_1.xlsx]

## Sheet: Sheet1
Figure 4:
A- Body weight			B-Body weight				C- VO2													D- VCO2
db/db+Vehicle	db/db+Ang-(1-7)		HFD+Vehicle	HFD+Ang-(1-7)	HFD+Ang-(1-7)+A779		Time	db/db+Vehicle					db/db+Ang(1-7)								db/db+Vehicle					db/db+Ang-(1-7)
40.5	37.69		36.7	29.6	36.1		1	29.4112	46.7741	59.0916	56.836		63.0384	77.7123	38.3479	67.8858	84.102	67.32		Full day	28.207	45.337	45.2136	46.7728		48.5347	53.7475	44.8922	62.6556	64.4302	53.8919
43.31	46.14		31	28.3	27.5		2	15.7045	42.0748	48.0638	47.4968		52.5423	67.0879	62.8335	66.3645	85.8402	63.575		Light	25.1424	47.6317	36.9077	42.1461		44.5232	46.262	41.0377	57.5886	53.849	44.4873
35.81	43.52		33.9	29.7	28.1		3	54.5497	70.2117	64.4472	45.5149		51.973	74.0972	56.3336	74.3219	69.5838	60.8449		Dark	30.7608	43.4248	52.1352	50.6285		51.8777	59.9854	48.1042	66.878	73.2478	61.7291
39.64	38.9		30.1	26.5	38.6		4	39.5734	36.8747	57.0405	50.4121		54.854	82.4449	37.0728	76.9464	74.1812	65.5624
46.22	35.58		32.3		32.1		5	41.012	33.9176	64.6866	51.1284		55.3565	60.7467	35.3608	68.8427	82.3576	72.8215
48.09					29.7		6	36.5171	32.0383	43.0433	47.058		41.1884	48.0261	52.3386	68.818	68.8126	45.8121
					32.2		7	34.2974	40.1567	40.3117	50.1975		40.3923	69.7051	49.821	61.6847	61.1233	46.6185
							8	39.5044	38.7768	32.6547	39.4465		35.4219	68.4076	45.9082	65.969	64.2453	44.0814
							9	31.7083	47.3419	34.8369	59.7967		47.109	61.8341	47.4405	71.2244	53.3603	53.592
							10	26.333	39.4881	35.649	45.0361		44.1045	61.9637	46.9352	56.0158	62.7308	45.0101
							11	37.4511	36.2135	42.7062	47.5722		65.5256	55.838	55.1703	81.9385	65.7044	59.0909
							12	28.9945	37.2179	34.4121	46.3044		42.792	65.3795	38.6414	53.5125	66.1311	67.32
							13	25.6685	55.9207	42.4514	41.4623		52.3714	44.3323	43.0503	67.7917	62.0162	53.8546
							14	23.5898	50.7835	43.9395	49.2088		45.2252	61.7649	46.8867	54.3735	65.8519	60.892
							15	27.4154	50.2288	46.6174	39.4958		46.4849	58.4623	40.3629	58.6819	66.1208	57.1409
							16	21.469	64.5567	43.1128	39.8227		50.9122	71.9913	44.0615	55.4449	60.1723	60.2516
							17	24.3909	52.3397	52.247	39.6142		43.9875	42.1132	44.456	66.699	61.2486	53.5263
							18	23.716	68.9293	48.4744	40.4951		54.4497	48.7882	35.6704	59.3253	64.4085	66.8711
							19	32.5759	61.1584	47.7307	43.1544		51.783	71.436	24.0262	63.4495	68.6965	75.188
							20	25.4944	57.0863	56.1803	48.5824		54.7351	67.2201	46.6545	66.9932	71.8684	67.2277
							21	29.0451	53.8849	54.956	56.4668		65.447	54.5096	55.2542	59.8974	79.3313	80.0355
							22	19.2837	61.8535	61.6238	51.8635		57.4778	72.8666	68.9943	66.1466	92.5341	78.1005
							23	28.8055	48.9461	56.4707	58.266		61.1415	74.107	60.7576	74.5936	81.8052	76.0719
							24	35.3508	61.1659	66.0114	55.9145		58.3362	83.2008	58.1403	71.7196	83.0417	75.959
E- EE															F- Core body temperature									H- Core body temperature																	I- UCP1 level
	db/db+Vehicle						db/db+Ang-(1-7)							30C	db/db+Vehicle	db/db+Ang-(1-7)	22C	db/db+Vehicle	db/db+Ang-(1-7)	4C	db/db+Vehicle	db/db+Ang-(1-7)			HFD+Vehicle						HFD+Ang-(1-7)					Ang-(1-7)+A779					db/db+Vehicle	db/db+Ang-(1-7)
Full day	3.12733	5.20985	5.19127	5.07919			5.48297	6.5046	4.94271	6.90491	7.7355	6.49134			36.6	36.9		32.8	34.2		28.6	30.9		0	32.4	32.7	34.1	32.3	32.7		33.7	33.6	34.5	34.3		33.7	33	33.8	33.4		0.8722	1.4538
Light	1.61174	3.00607	2.48968	2.67959			2.91501	3.30178	2.23829	3.71267	3.67496	3.04413			37.2	35.8		33.1	33.9		27.9	31.5		1	30.9	30.8	29.3	29.9	31.7		31.2	29.2	31.9	28.6		28.2	28.7	30.4	28.2		1.054	1.7633
Dark	1.44985	2.21466	2.5228	2.31605			2.48617	3.04714	2.63243	3.10487	3.84468	3.28993			35.9	37.1		32.1	34.3		28.1	29.6		2	29.6	31.1	29.6	27.7	28.5		30.5	30.4	31.6	31.5		28.9	28.8	30	30.9		0.9366	2.4376
															36.7	36.8		32.3	33.1		27.3	31		3	30	32	31.8	33	31.4		31.3	30.6	31.2	28.5		31.4	28.3	30.5	32.4		0.9437	1.6736
															37	36.3		31.9	34.9		28.5	31.3																			1.163	2.0745
J- SUV			K- SUV
db/db+Vehicle	db/db+Ang-(1-7)		HFD+Vehicle	HFD+Ang-(1-7)	HFD+Ang-(1-7)+A779
0.2245	0.5242		0.1284	0.73847	0.1094
0.2436	0.30787		0.2849	0.5873	0.18384
0.13566	0.585		0.12373	0.39492	0.30293
0.12675	0.46465
L- immunoblot								M- immunoblot
	db/db+Vehicle			db/db+Ang-(1-7)					HFD+Vehicle			HFD+Ang-(1-7)			HFD+Ang(1-7)+A779
UCP1	0.83813	0.838512	0.625053	1.64062	1.8889	1.69739		UCP1	0.446133	0.757808	0.842212	1.64541	1.68757	1.33571	0.838825	0.676069	0.561235
PGC-1α	0.703883	0.779817	0.710784	1.24764	1.21492	1.14634		PGC-1α	0.150848	0.220708	0.28987	0.553091	0.545432	0.956927	0.779665	0.327211	0.238023
ATP5A	0.753811	0.555936	0.677954	1.17067	0.909457	0.831531		ATP5A	0.612657	0.860581	0.70732	0.989499	0.899474	0.826788	1.00884	1.05417	0.845559
UQCRC2	2.00261	2.44824	2.35471	2.62059	2.5278	1.69319		UQCRC2	0.64831	0.73392	0.840014	1.13077	1.15923	1.1086	1.15127	1.13708	1.16651
SDHB	2.72803	2.93222	2.61449	2.93485	2.73426	2.37929		SDHB	0.781629	0.870582	0.72746	0.855077	0.991063	0.83371	1.23954	1.07377	1.09039
NDUFB8	0.728029	0.93222	0.614488	1.23485	1.13426	1.37929		NDUFB8	0.639275	0.868293	0.988031	1.0575	1.10907	0.924842	1.40221	1.09736	0.954005
